# Supplementary material for: Self-assembly and cellular distribution of a series of transformable peptides
Source: Royal Society of Chemistry journal article supplement (doi:10.1039/d1tb02814f), 2022-01-01
Supplement: d1tb02814f1.pdf [file d1tb02814f1.pdf]

## Supplementary Information

### Self-assembling and cellular distribution of a series of transformable peptides

Xuefeng Gong,<sup>‡ac</sup> Gaofeng Qi,<sup>‡bc</sup> Yijing Li,<sup>ac</sup> Kuo Zhang,<sup>ac</sup> Yonghong Gao,<sup>ac</sup> Dong Wang,<sup>\*a</sup> Hui Cao,<sup>a</sup> Zhou Yang,<sup>a</sup> and Lei Wang<sup>\*c</sup>

<sup>a</sup> Department of Materials Physics and Chemistry, School of Materials Science and Engineering, University of Science and Technology Beijing, Beijing, 100083, China.

E-mail: [wangdong@ustb.edu.cn](mailto:wangdong@ustb.edu.cn).

<sup>b</sup> Department of Graduate, Hebei North University, Zhangjiakou 075000, Hebei Province, China.

<sup>c</sup> CAS Center for Excellence in Nanoscience, CAS Key Laboratory for Biomedical Effects of Nanomaterials and Nanosafety, National Center for Nanoscience and Technology (NCNST), Beijing, 100190, China.

E-mail: [wanglei@nanoctr.cn](mailto:wanglei@nanoctr.cn).

<sup>‡</sup> Equal contribution.

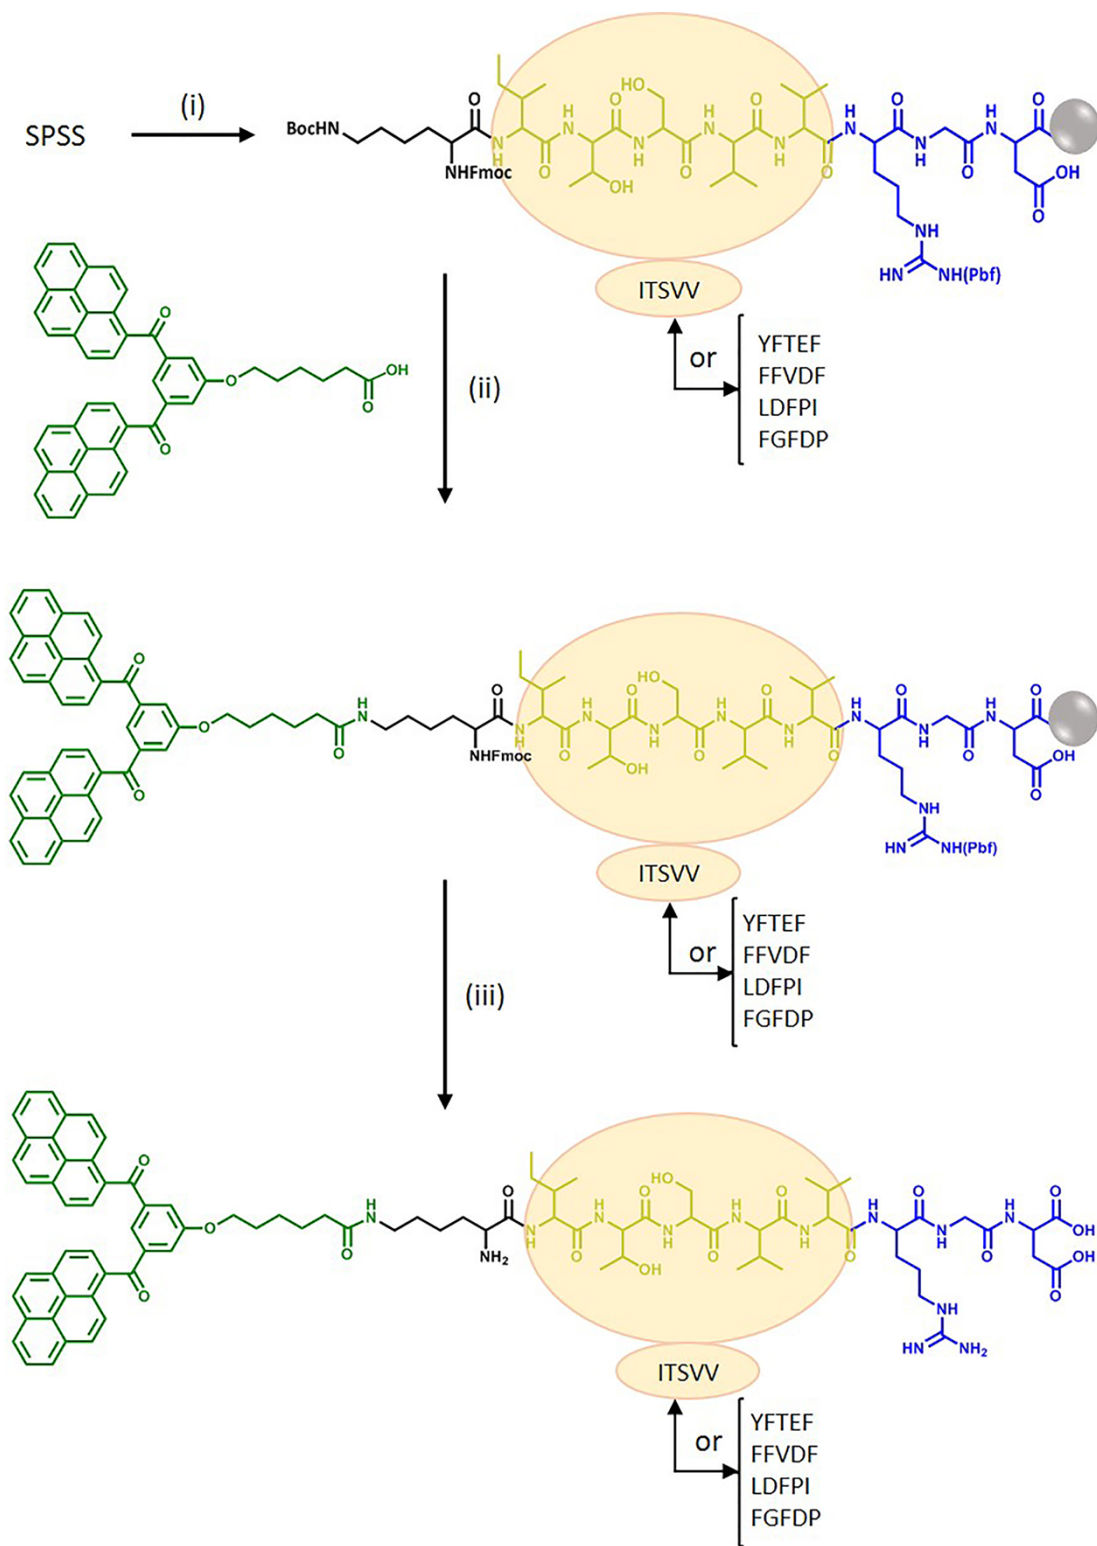

**Figure S1.** Synthetic route of TP1, 2, 3, 4 and 5 (i) 2% DBU, DMF; Fmoc solid-phase peptide synthesis method: NMM, N-HBTU, DMF ; (ii) BP-COOH, NMM, HBTU, DMF; (iii) TFA/TIS/H<sub>2</sub>O (v/v/v = 95:2.5:2.5), 3 h, ice bath.

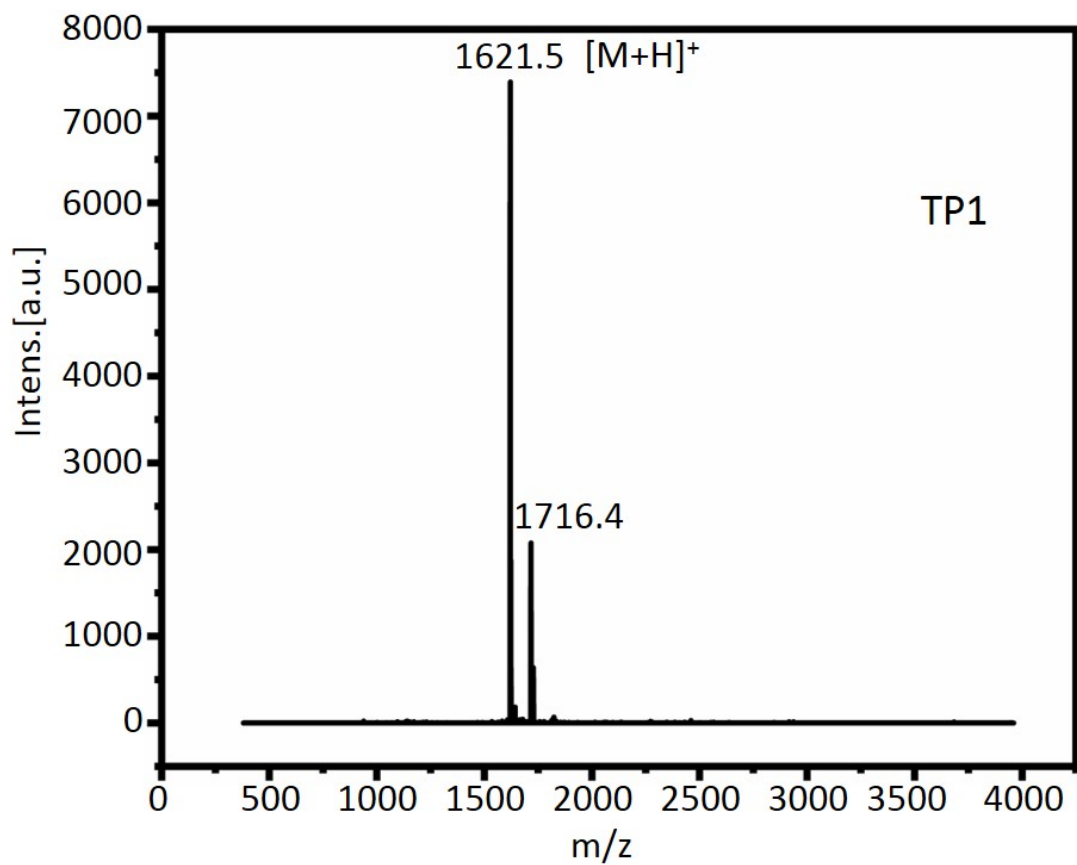

**Figure S2.** MALDI-TOF mass spectrum of TP1.

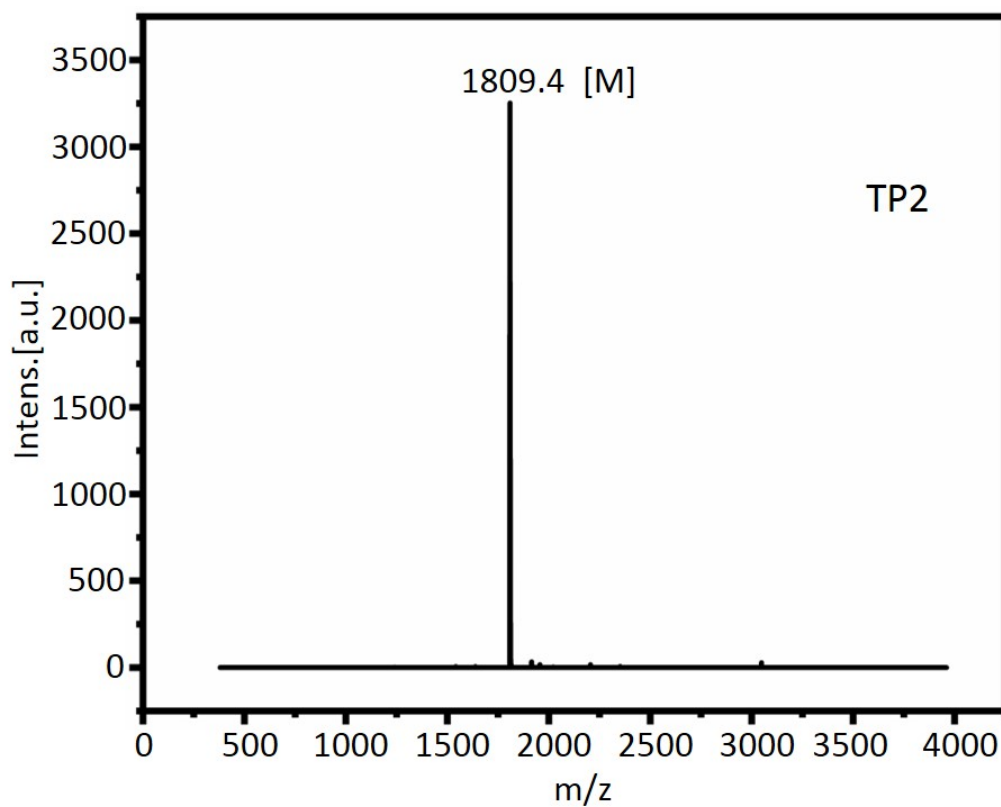

**Figure S3.** MALDI-TOF mass spectrum of TP2.

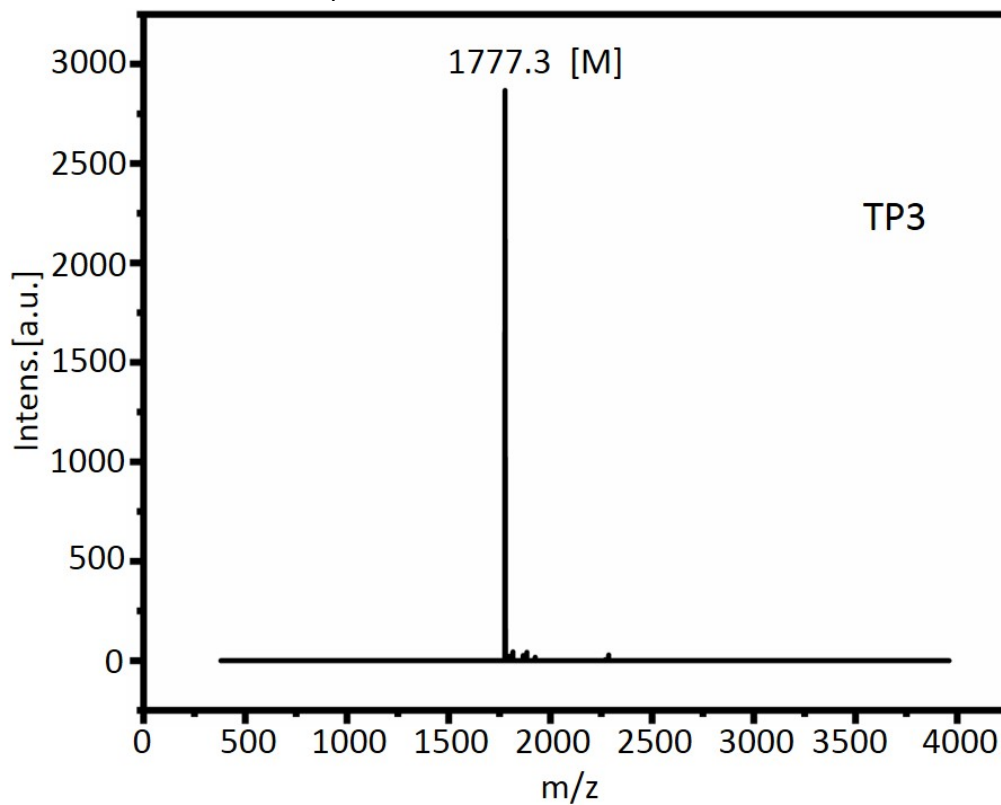

**Figure S4.** MALDI-TOF mass spectrum of TP3.



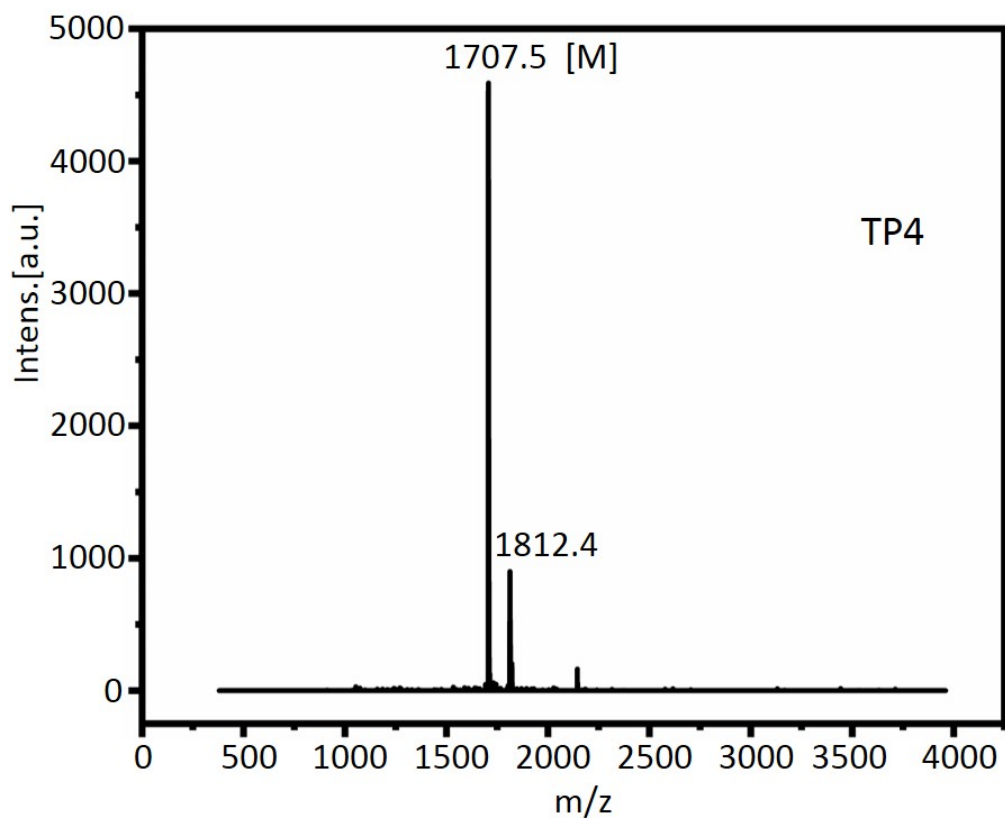

Figure S5. MALDI-TOF mass spectrum of TP4.

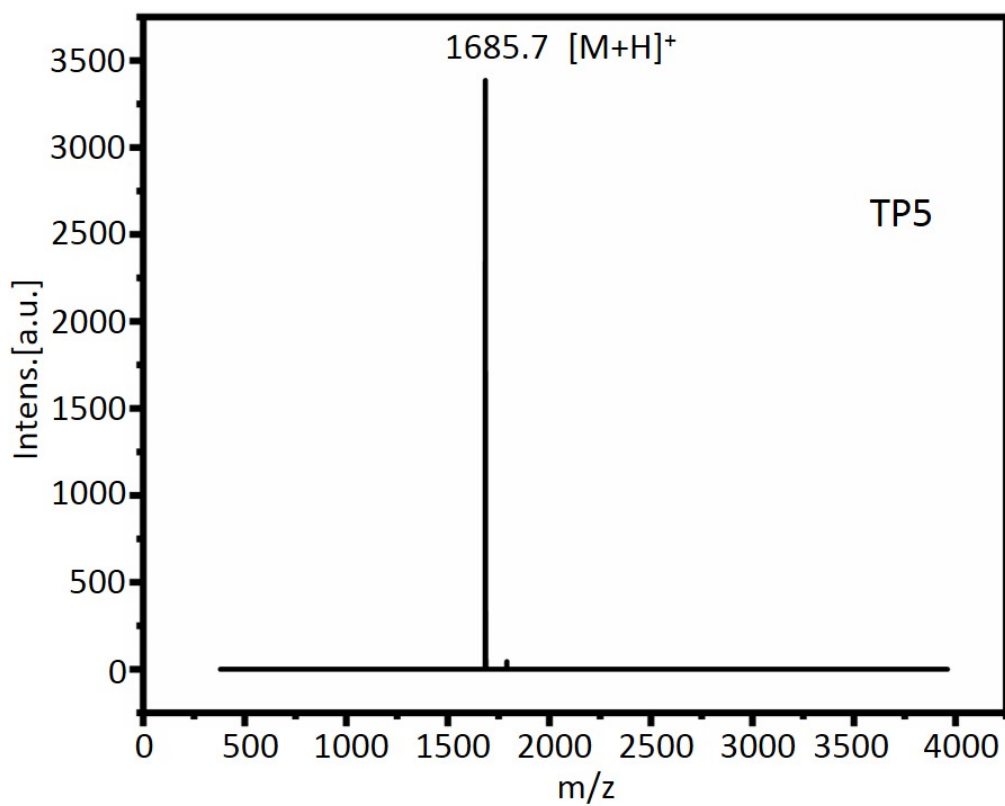

Figure S6. MALDI-TOF mass spectrum of TP5.

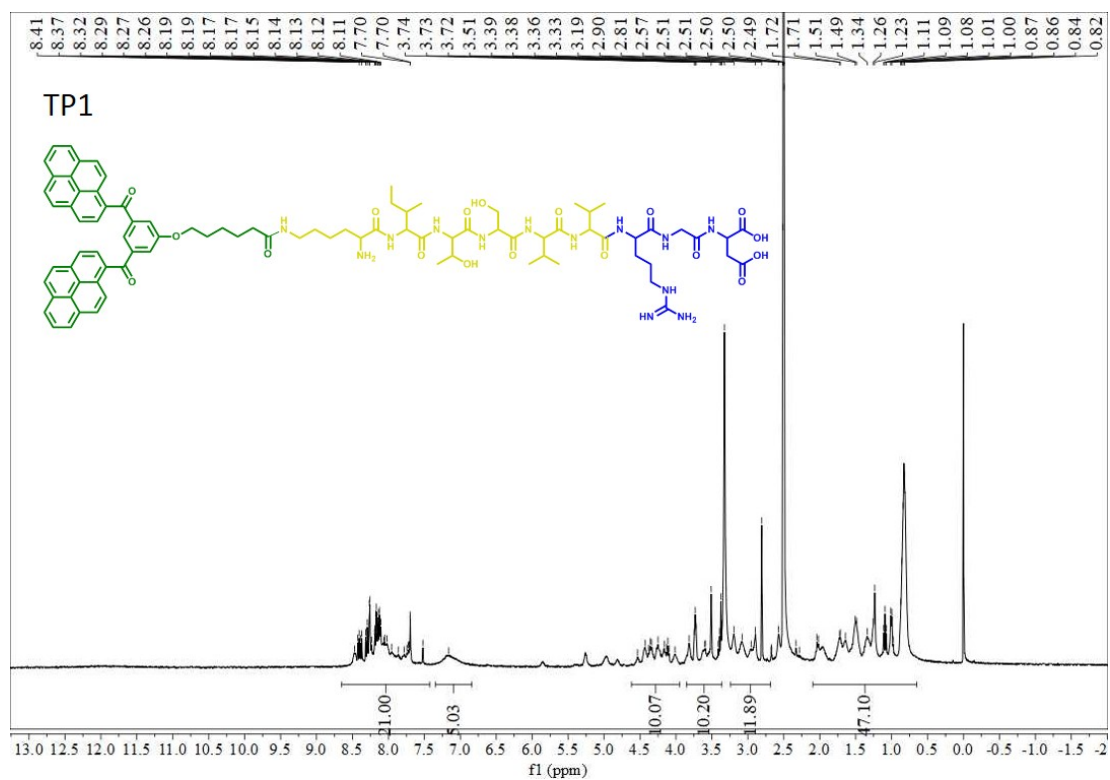

**Figure S7.**  $^1\text{H}$  NMR spectrum of TP1.

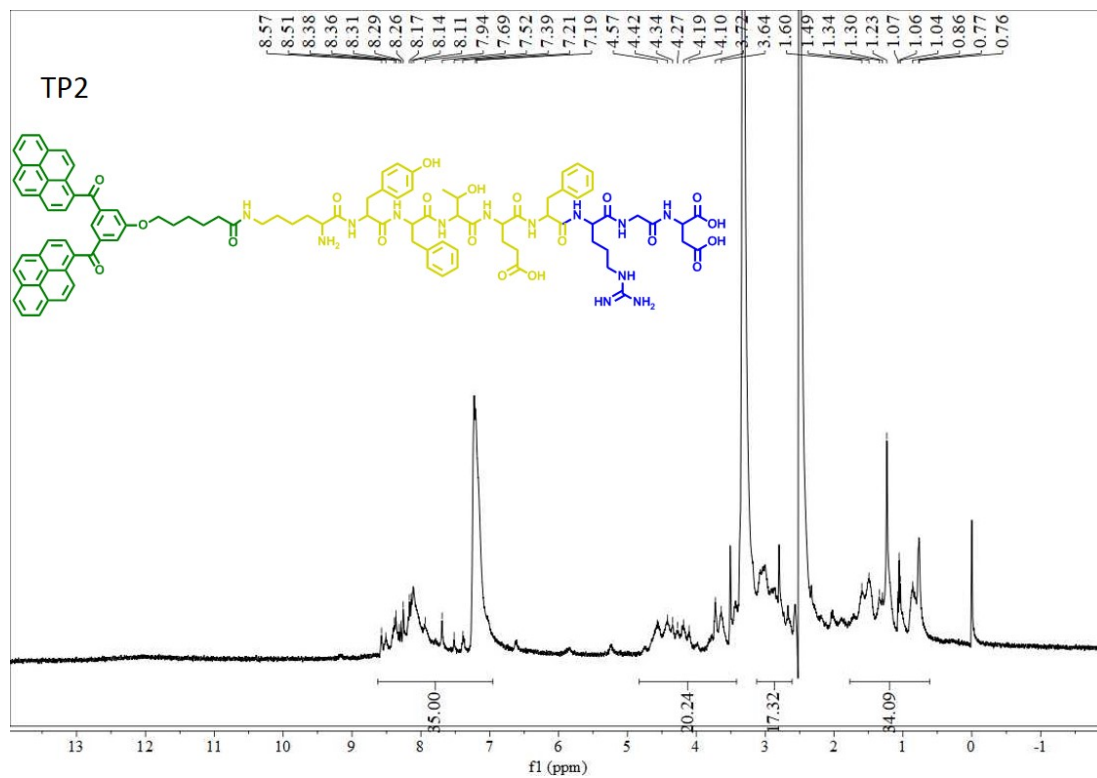

**Figure S8.**  $^1\text{H}$  NMR spectrum of TP2.

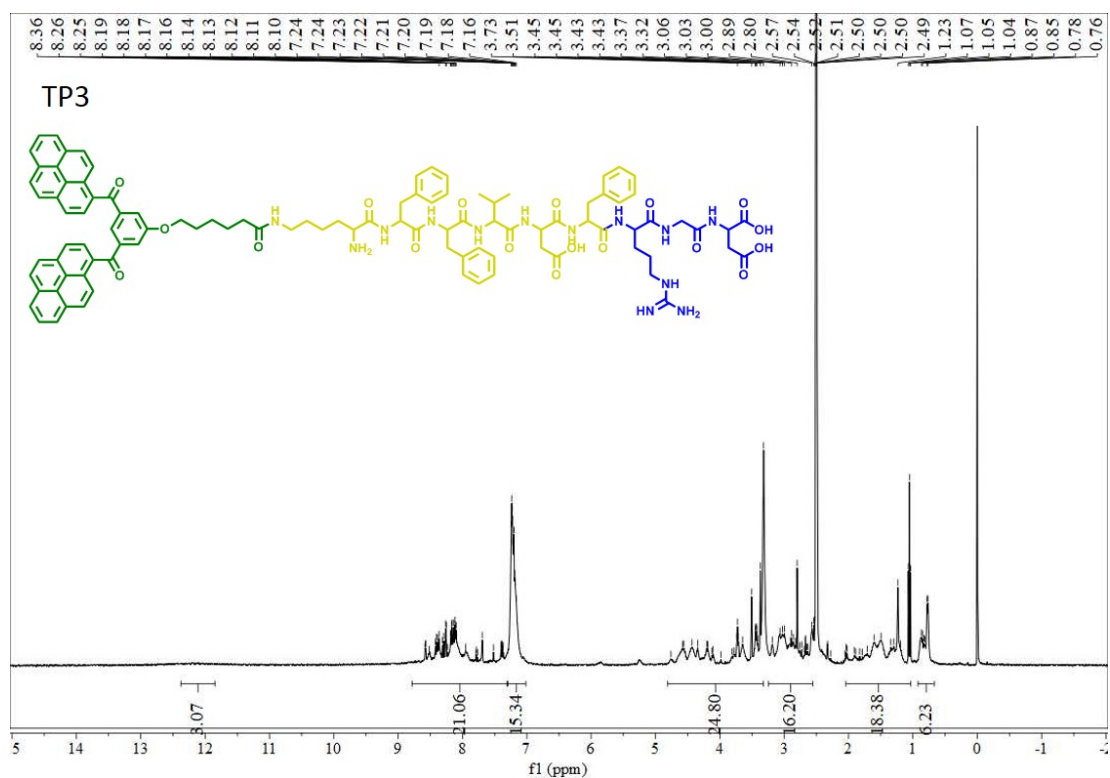

Figure S9.  $^1\text{H}$  NMR spectrum of TP3.

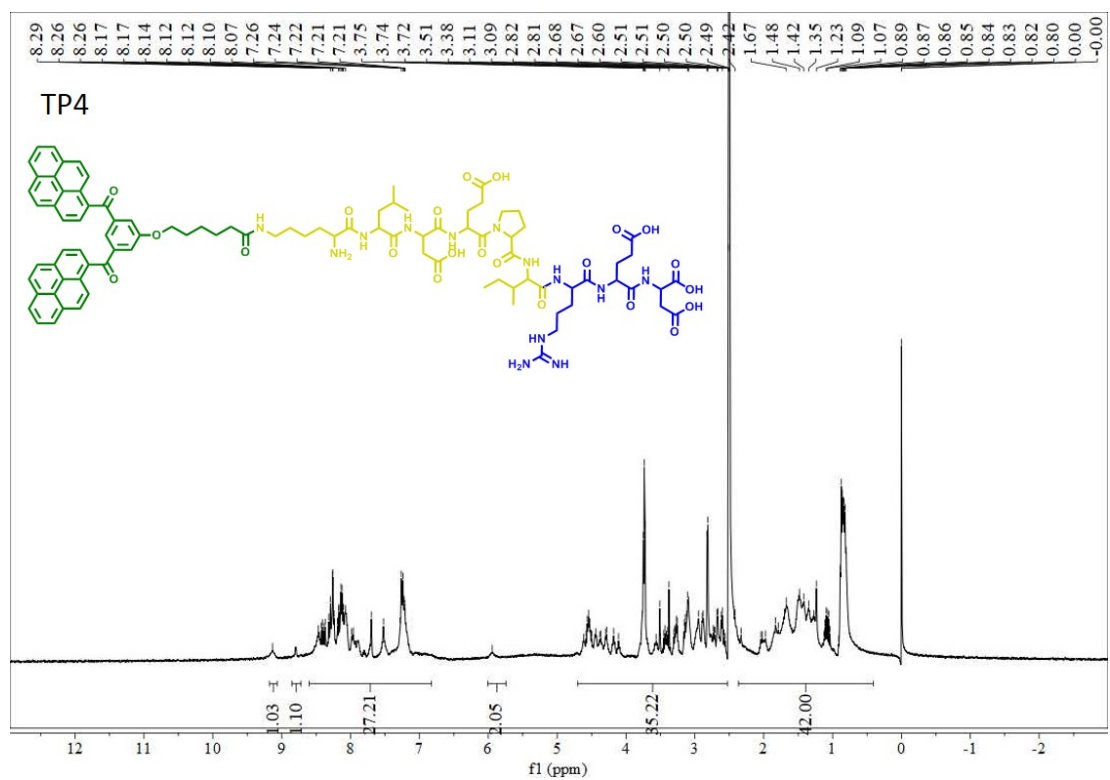

Figure S10.  $^1\text{H}$  NMR spectrum of TP4.

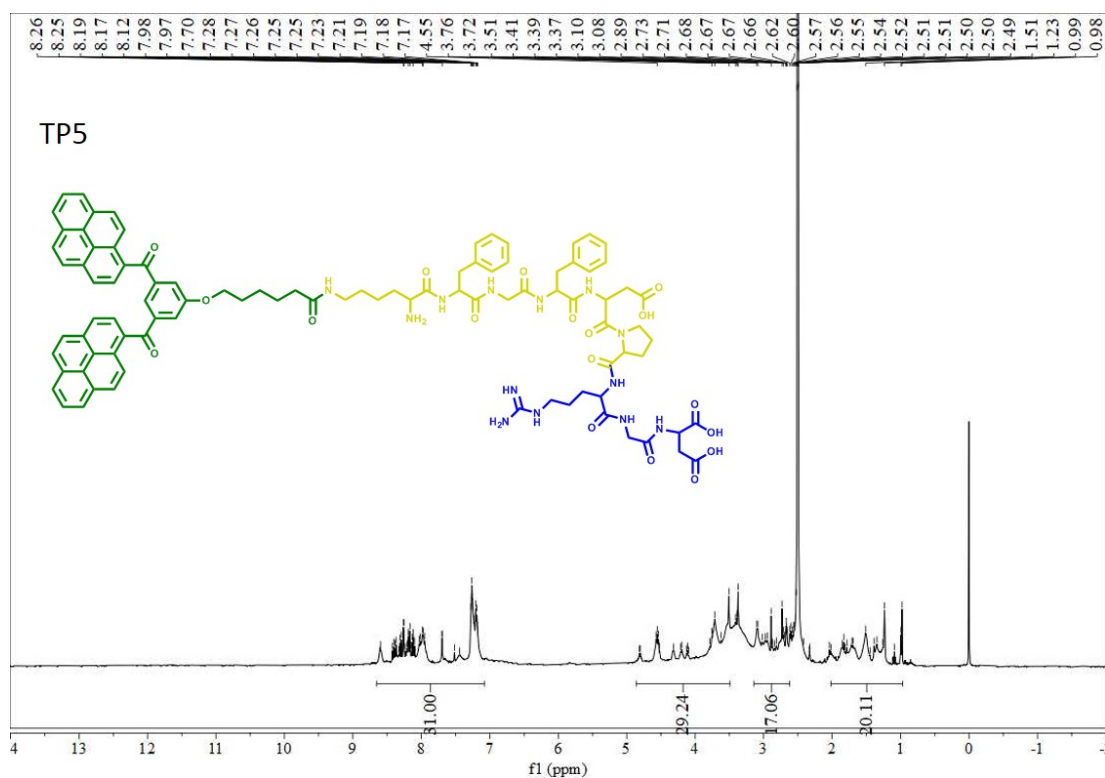

**Figure S11.** <sup>1</sup>H NMR spectrum of TP5.

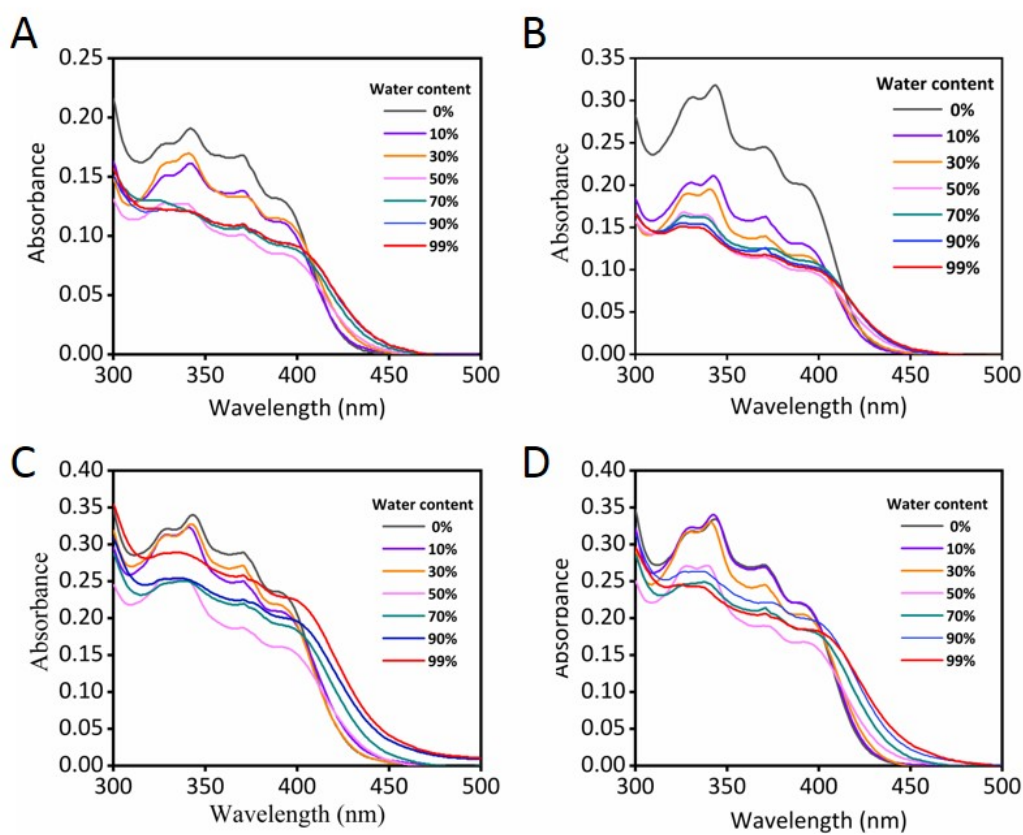

**Figure S12.** UV-vis characteristics spectra of self-assembly process to form (A) TP2, (B) TP3, (C) TP4 and (D) TP5 nanoparticles or nanosheets in mixed H<sub>2</sub>O/DMSO solutions

( $c = 3.0 \times 10^{-5} \text{ M}$ ).

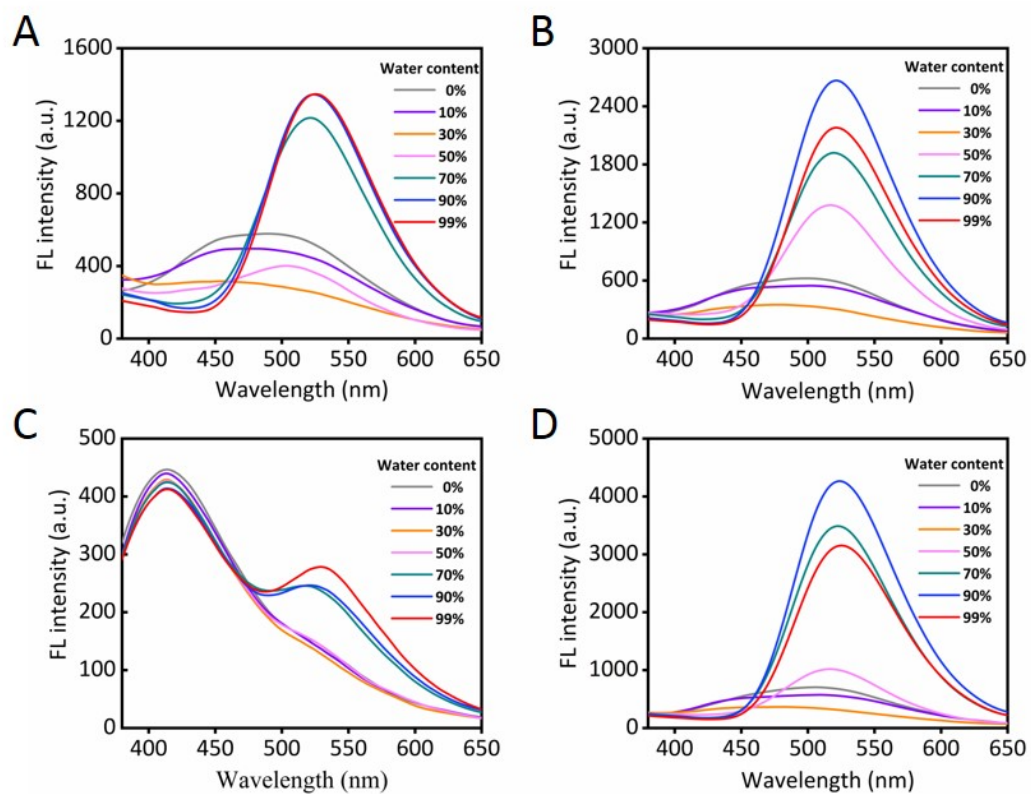

**Figure S13.** Fluorescence characteristics spectra of self-assembly process to form (A) TP2, (B) TP3, (C) TP4 and (D) TP5 nanoparticles or nanosheets in mixed H<sub>2</sub>O/DMSO solutions ( $c = 3.0 \times 10^{-5} \text{ M}$ ).

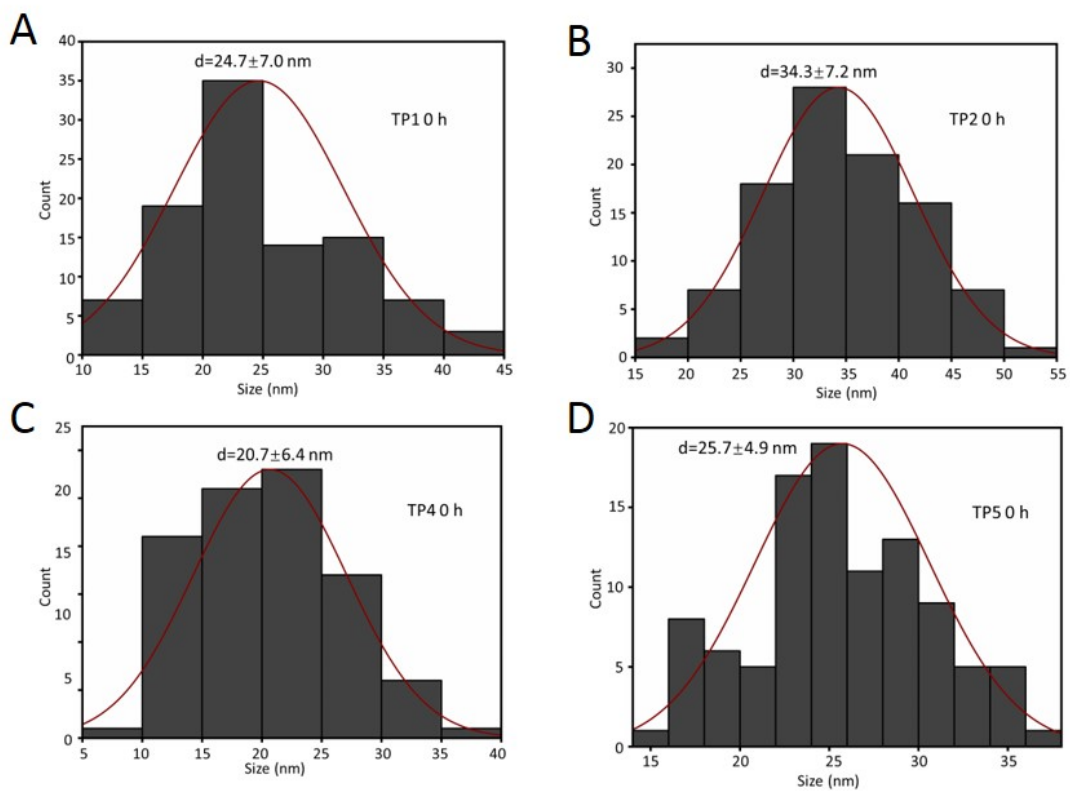

**Figure S14.** The size distribution of TP1, TP2, TP4 and TP5 nanoparticles at 0 h from TEM images.

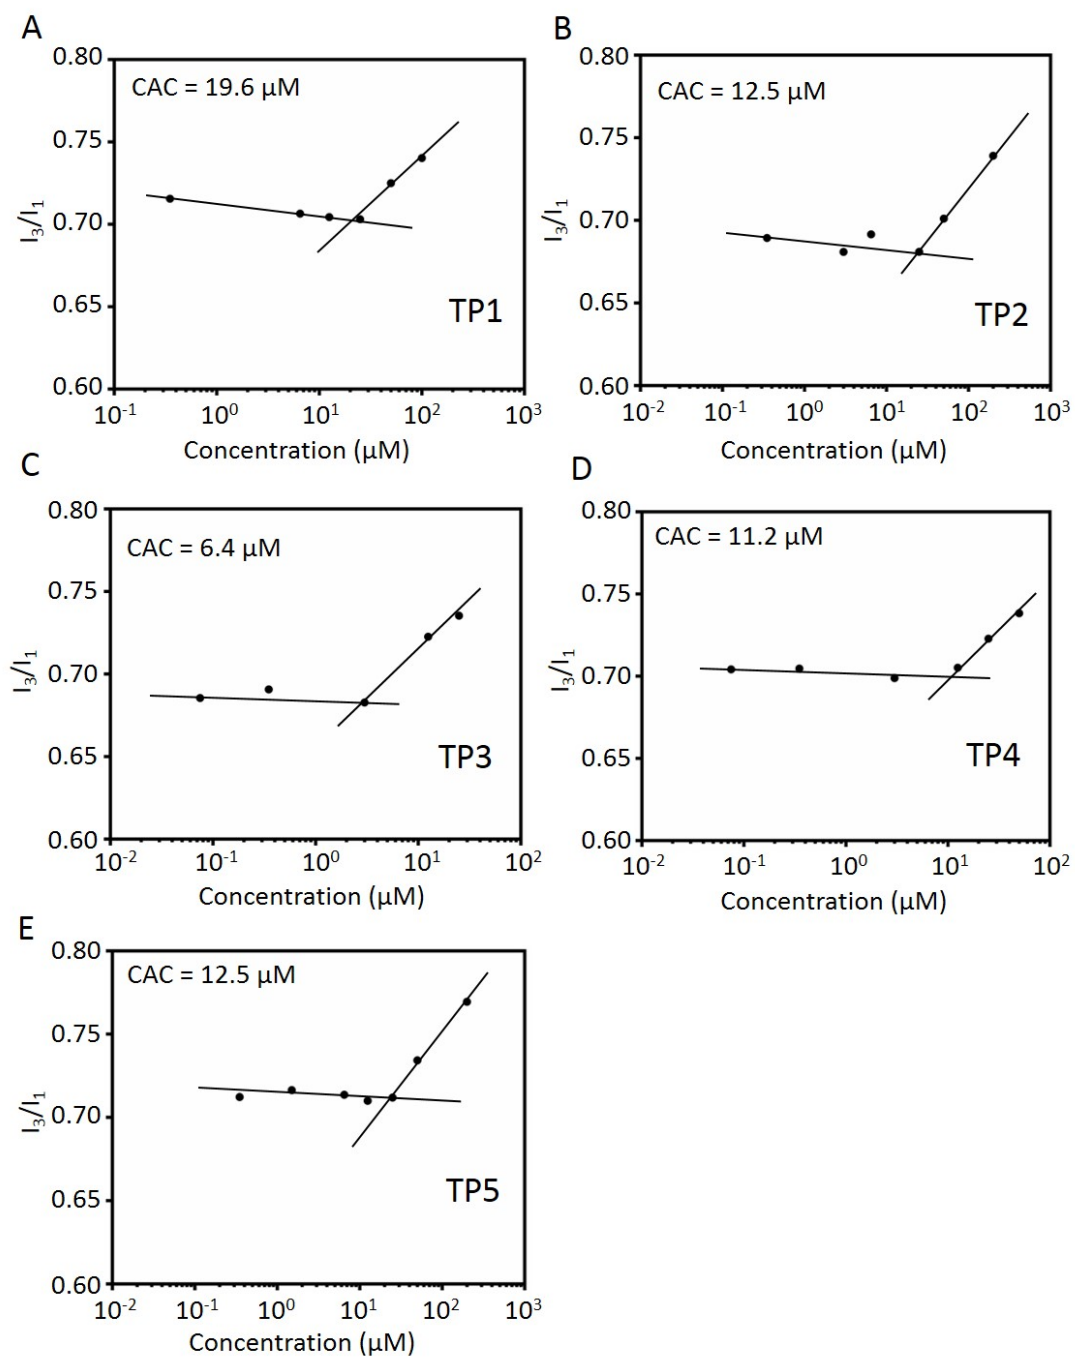

**Figure S15.** CAC values of TPs that measured by the pyrene fluorescence method.



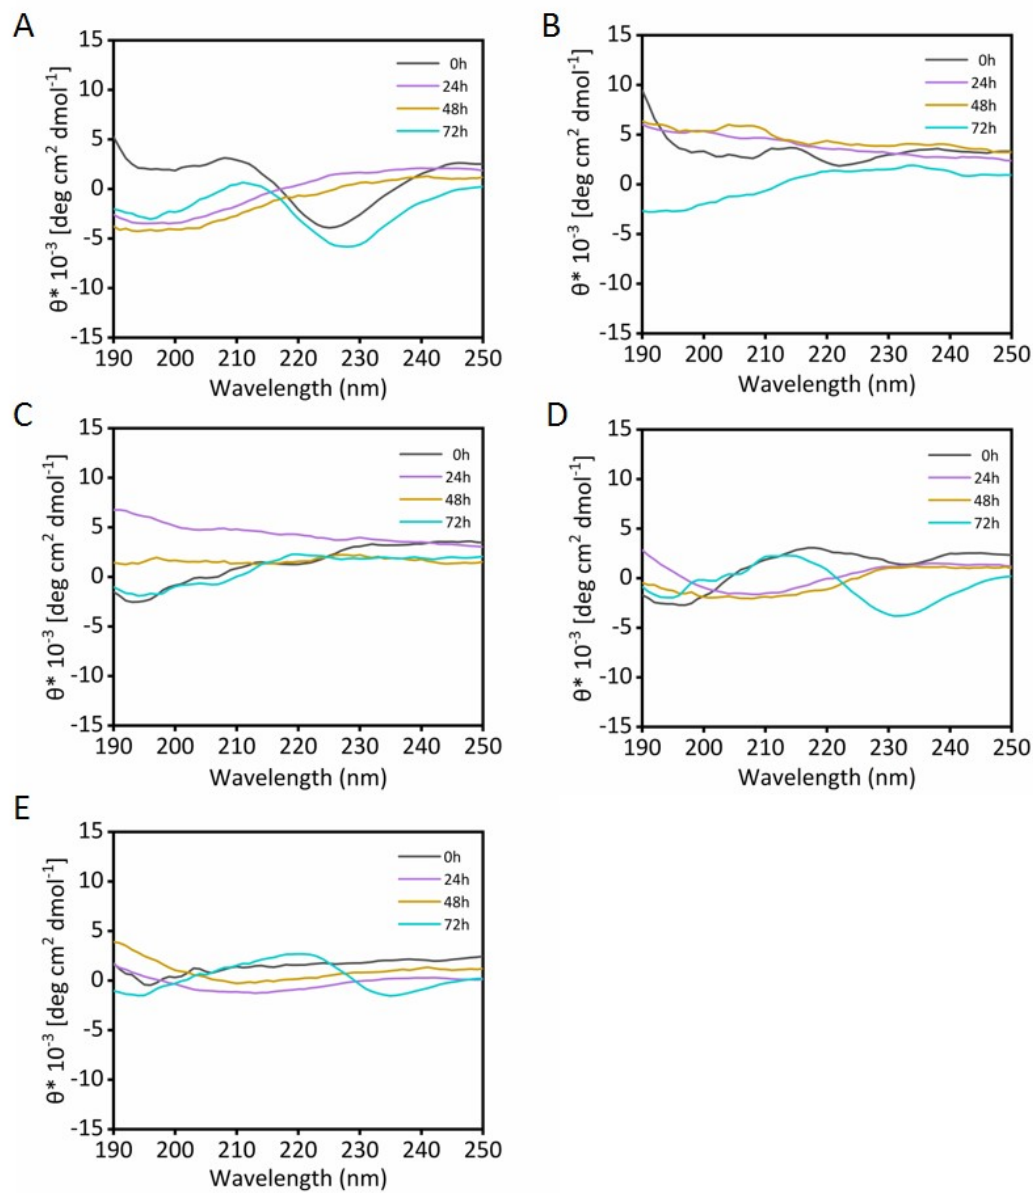

**Figure S16.** CD of (A) TP1, (B) TP2, (C) TP3, (D) TP4 and (E) TP5 nanoaggregates structural evolution in the presence of Ca<sup>2+</sup> ions in aqueous solutions ( $c = 3.0 \times 10^{-5}$  M) in 72 h.



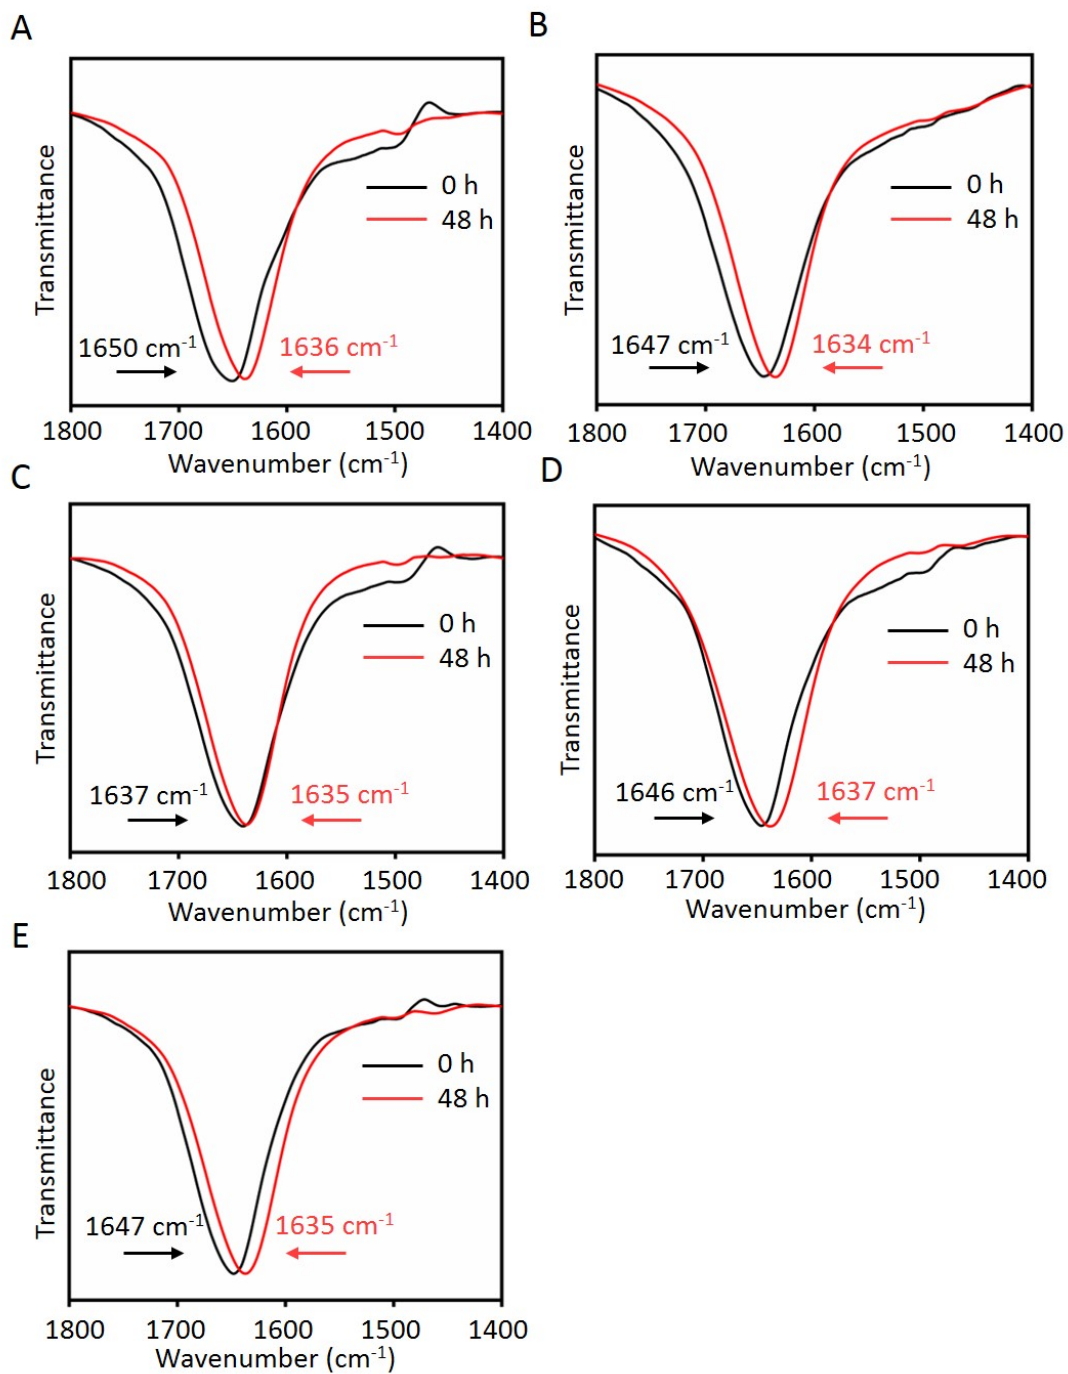

**Figure S17.** Fourier transform infrared spectra of TPs, (A) TP1, (B) TP2, (C) TP3, (D) TP4 and (E) TP5, at 0 h and 48 h.

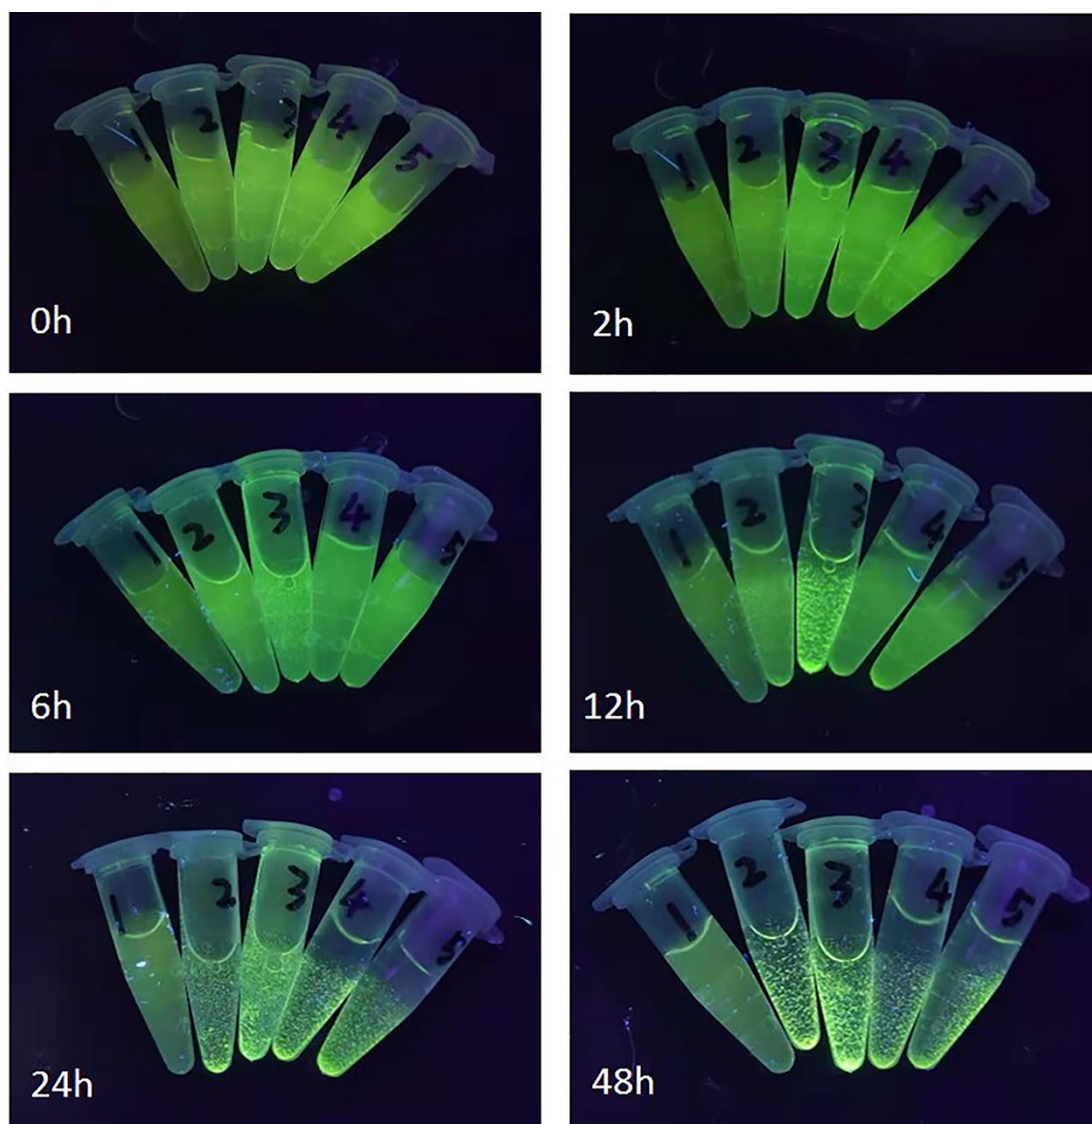

**Figure S18.** Time-dependent aggregation state of the TP1-5 from left (1) to right (5) in mixed H<sub>2</sub>O/DMSO solutions ( $c = 3.0 \times 10^{-5}$  M) at 0, 2, 6, 12, 24, 48 h observed under the 365 nm UV lamp.

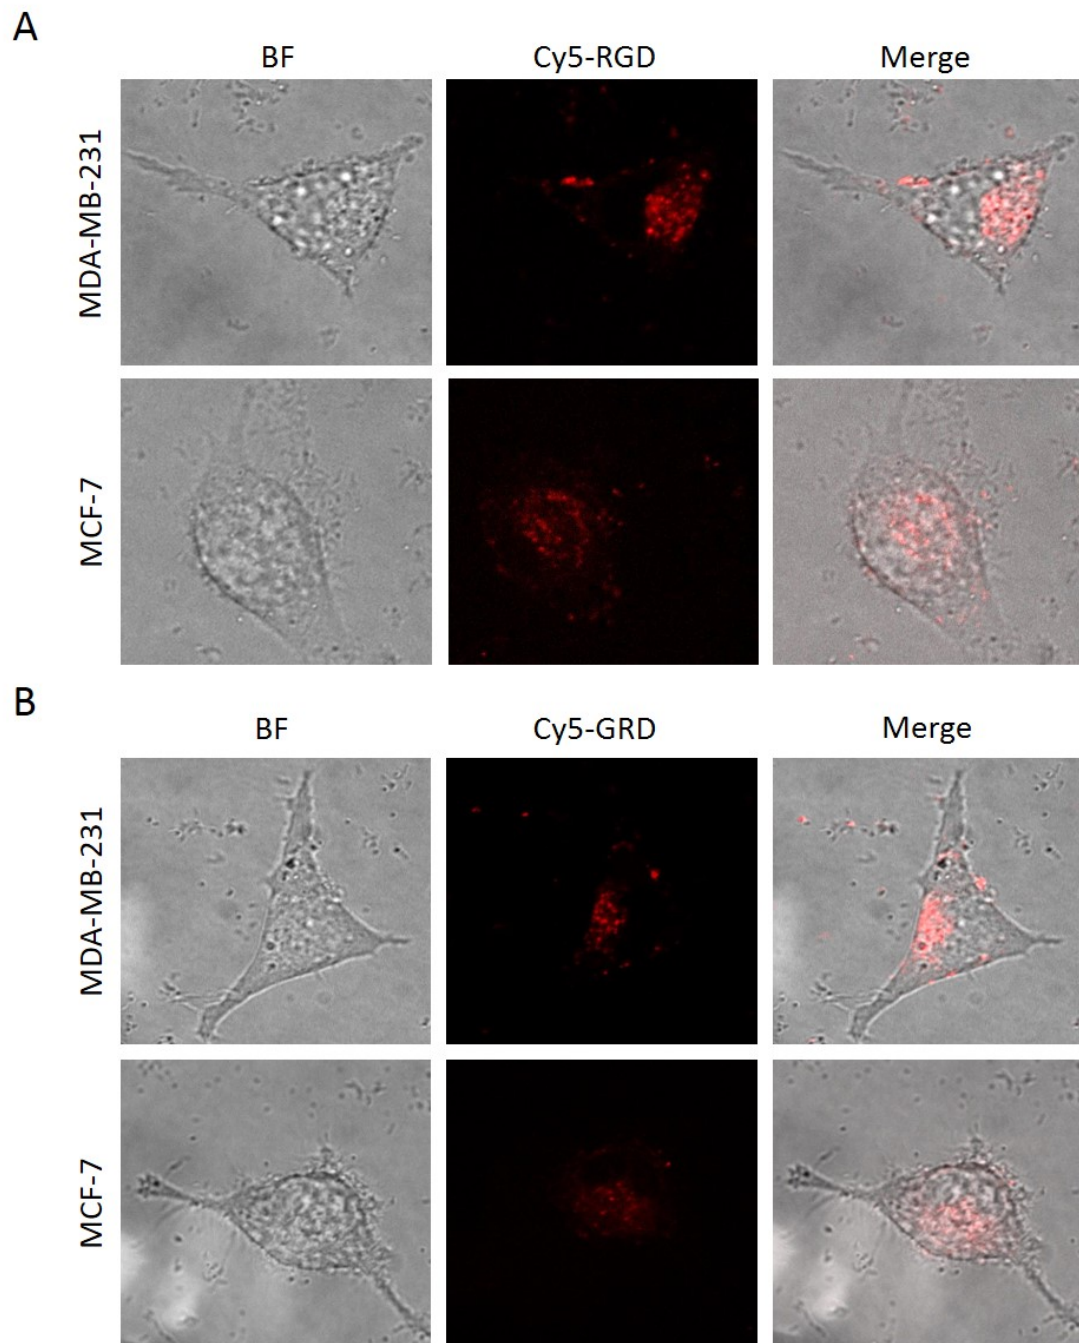

**Figure S19.** The targeting peptide RGD and the scrambled sequence GRD were prepared with a fluorescent dye Cy5 label. Cy5-RGD and Cy5-GRD cultured with MDA-MB-231 and MCF-7 cells for 1 h, respectively. It was found that the peptides were internalized into cells.

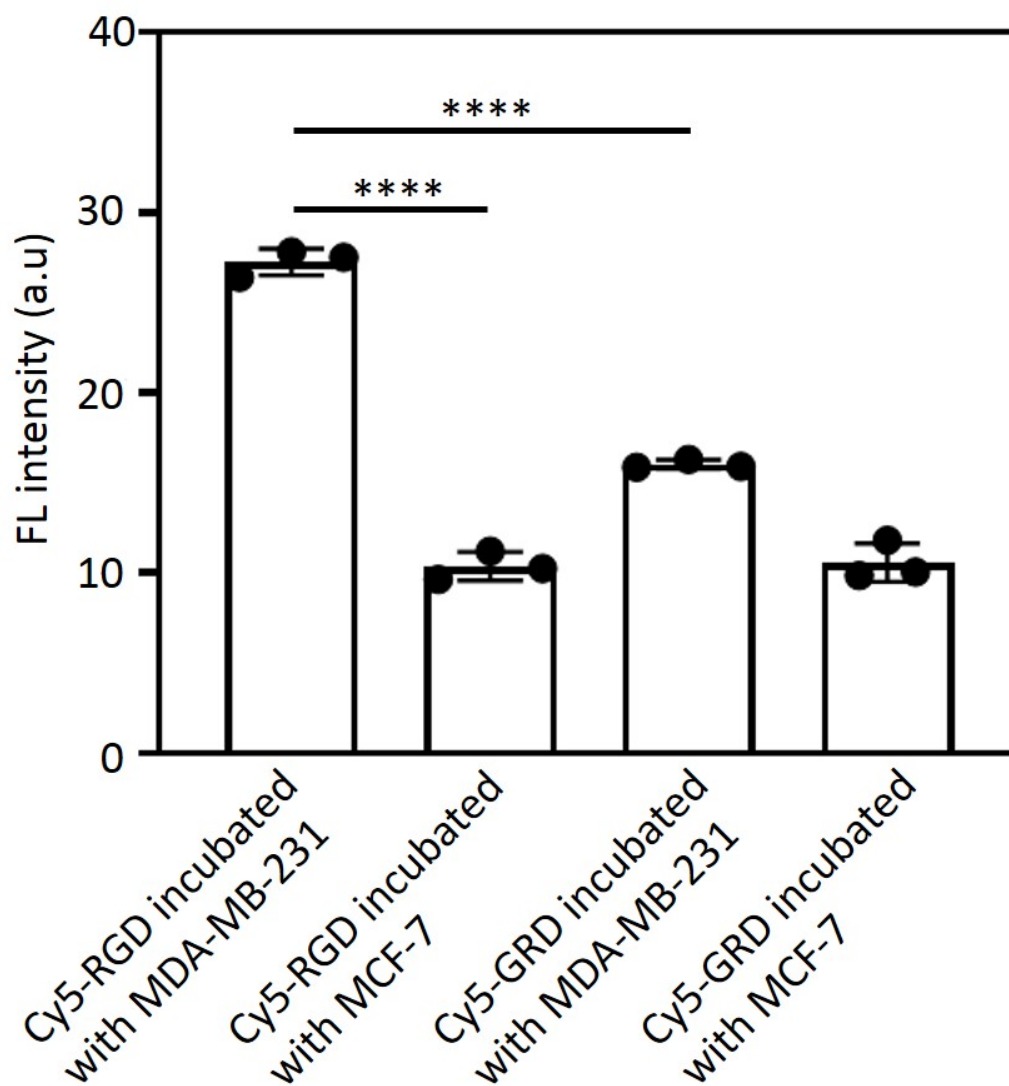

**Figure S20.** The quantitative analysis of fluorescence intensity of intracellular Cy5-RGD and Cy5-GRD. The results indicated that the uptake of RGD by MDA-MB-231 cells was higher than that by MCF-7 cells, suggesting that the expression of integrin on MDA-MB-231 cells was higher than that on MCF-7 cells. In addition, the Cy5-RGD treated MDA-MB-231 cells with high integrin expression showed higher fluorescence intensity than Cy5-GRD treatment, suggesting that RGD had target selectivity for MDA-MB-231 cells with high integrin expression over MCF-7 cells with low expression of integrin.

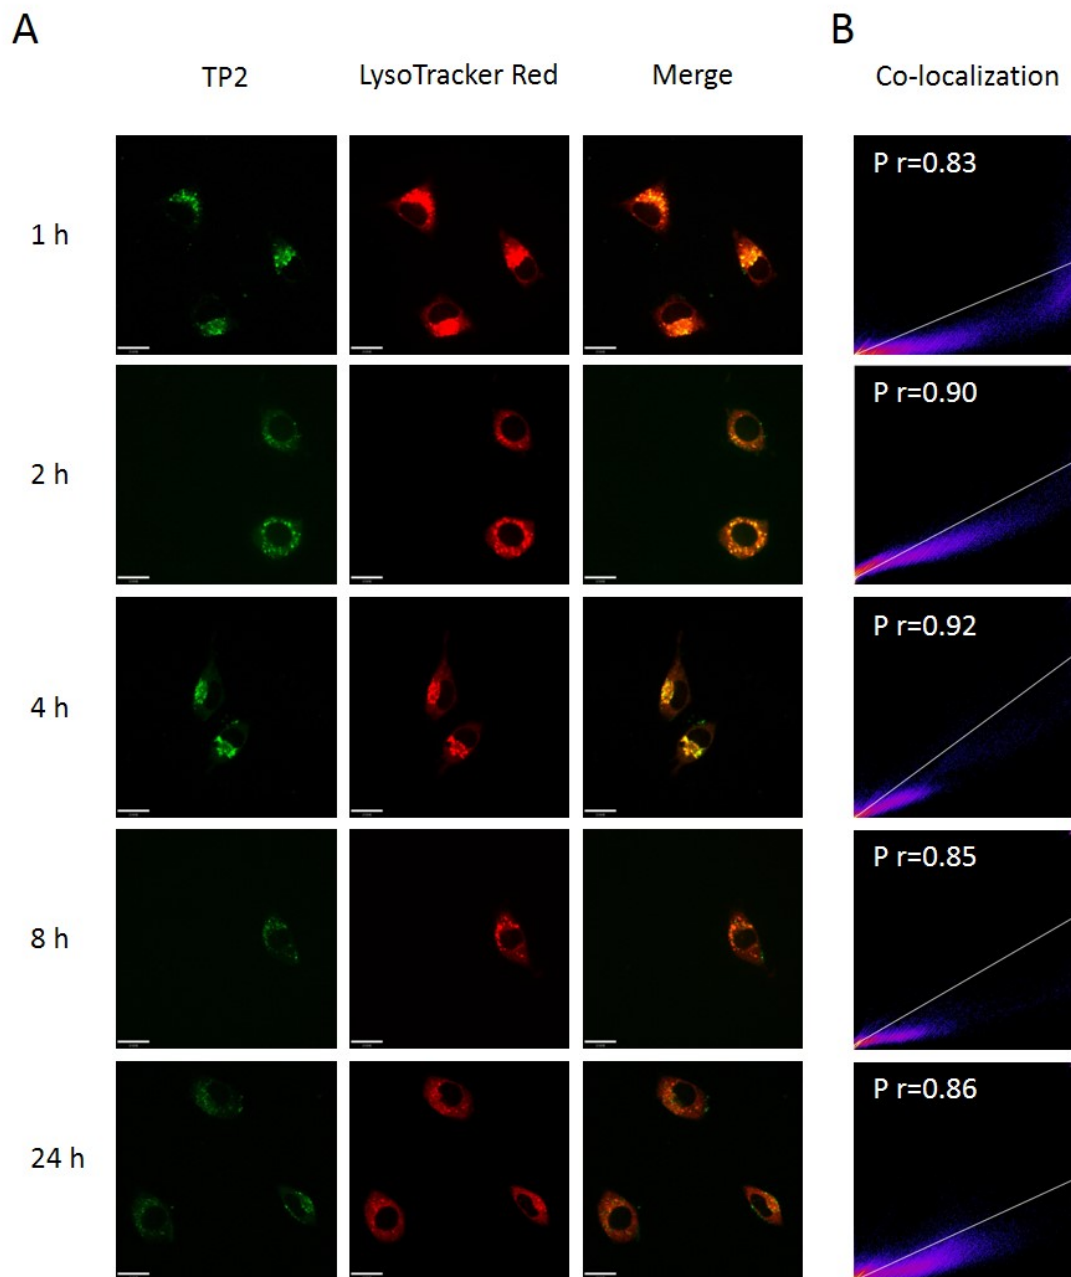

**Figure S21.** Biodistribution of TP2 in MDA-MB-231 cells. (A) CLSM images of MDA-MB-231 cells incubated with TP2 (40  $\mu$ M) in a time-dependent (1, 2, 4, 8, 24 h) mode, indicating the lysosomal distribution of TP2. Red (Lyso-Tracker Red) denotes lysosome. Green denotes TP2. The scale bar is 17  $\mu$ m. (B) Corresponding colocalization analysis of images from 'A'.



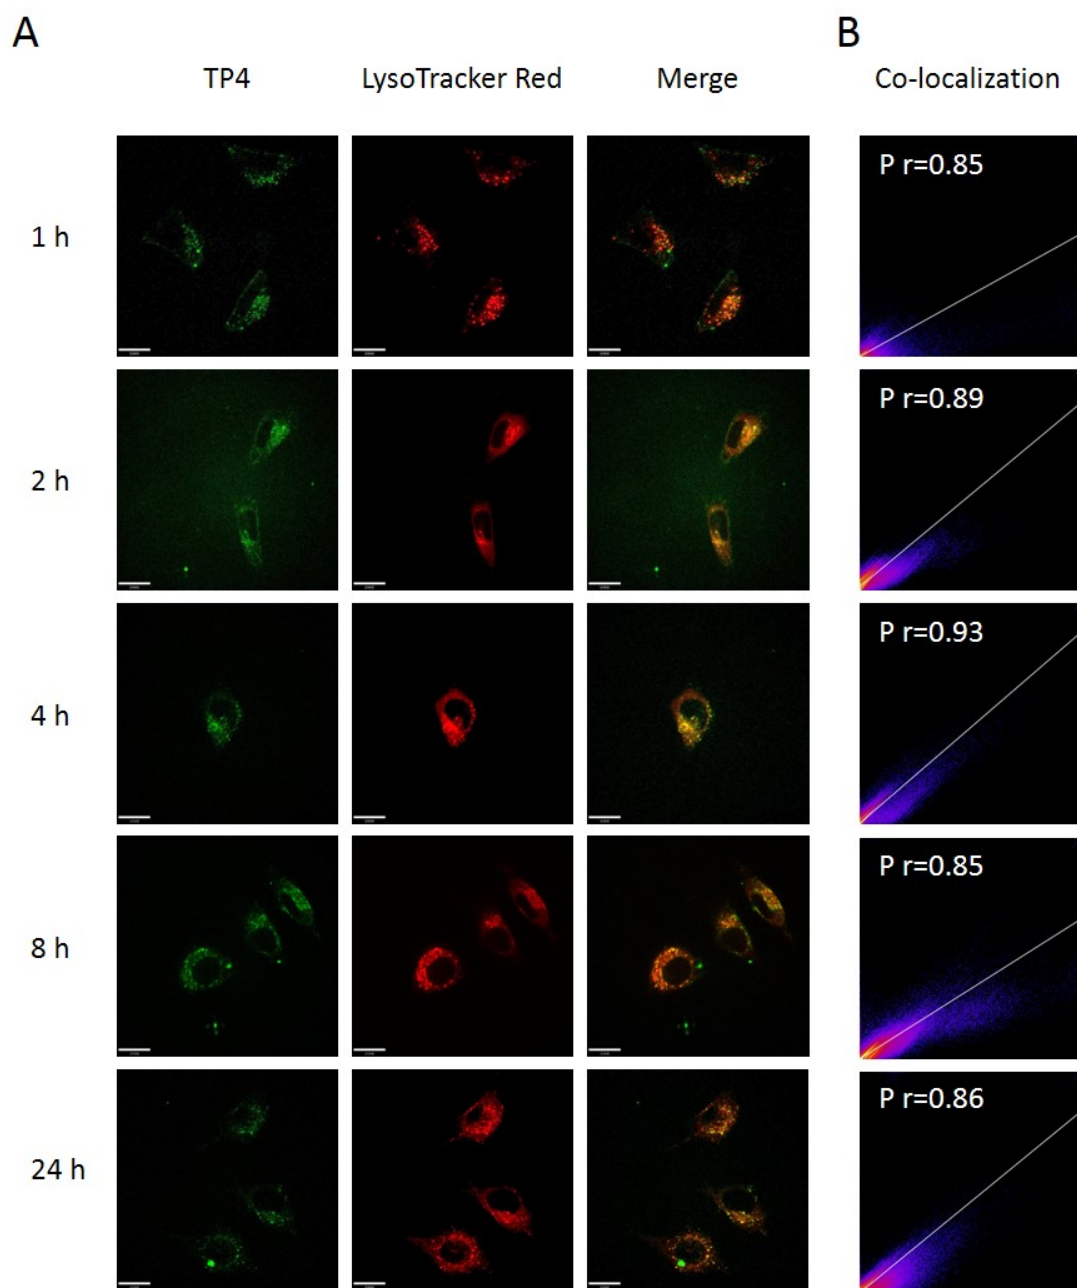

**Figure S22.** Biodistribution of TP4 in MDA-MB-231 cells. (A) CLSM images of MDA-MB-231 cells incubated with TP4 (40  $\mu$ M) in a time-dependent (1, 2, 4, 8, 24 h) mode, indicating the lysosomal distribution of TP4. Red (Lyso-Tracker Red) denotes lysosome. Green denotes TP4. The scale bar is 17  $\mu$ m. (B) Corresponding colocalization analysis of images from 'A'.

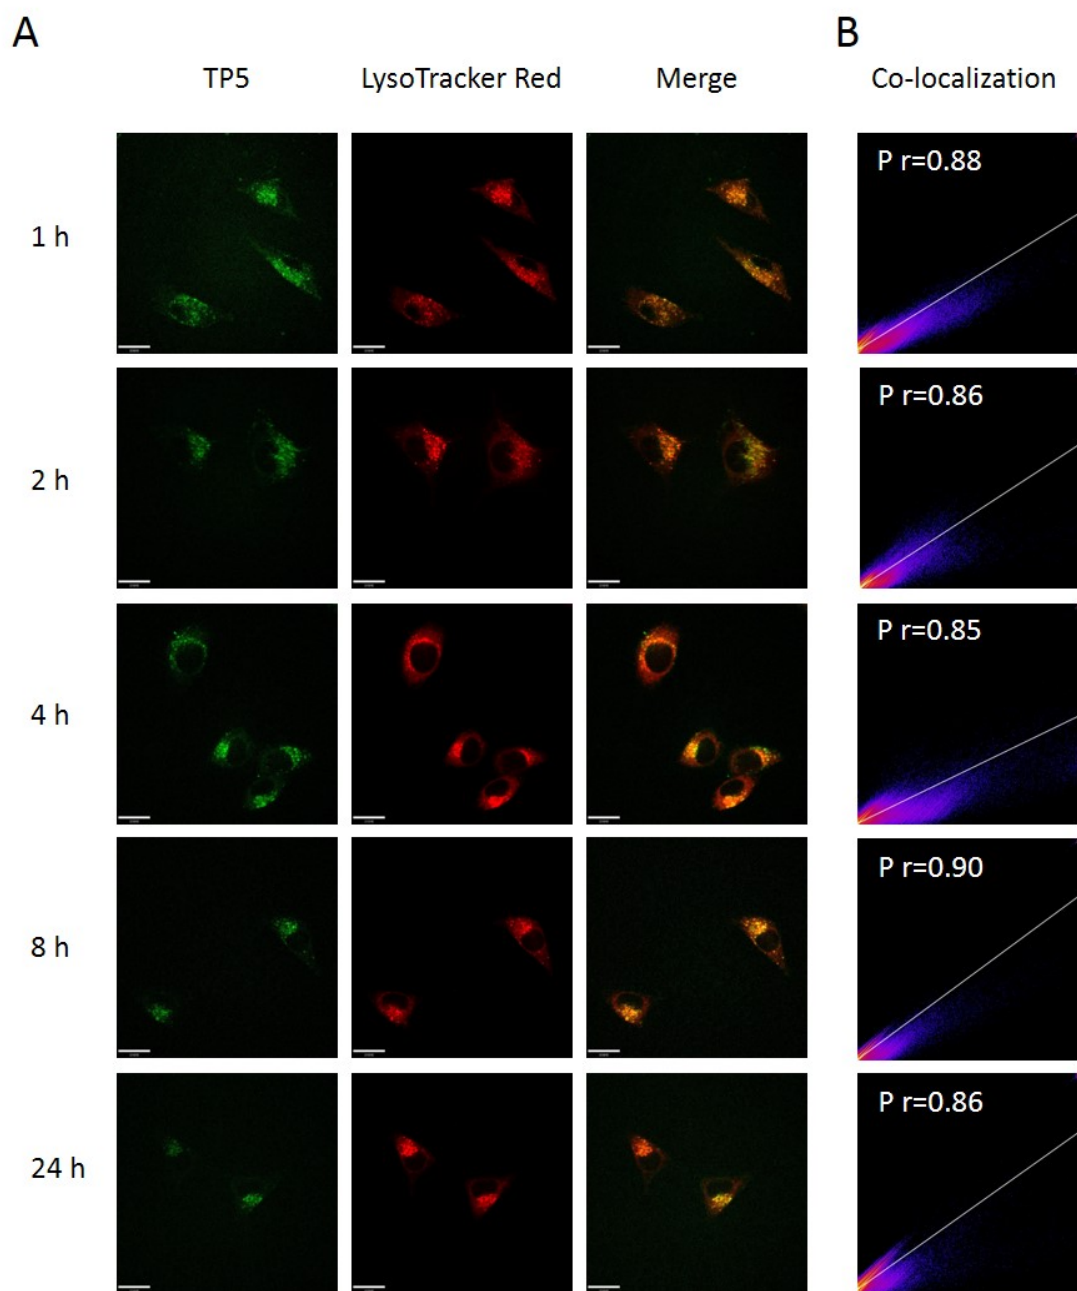

**Figure S23.** Biodistribution of TP5 in MDA-MB-231 cells. (A) CLSM images of MDA-MB-231 cells incubated with TP5 (40  $\mu$ M) in a time-dependent (1, 2, 4, 8, 24 h) mode, indicating the lysosomal distribution of TP5. Red (Lyso-Tracker Red) denotes lysosome. Green denotes TP5. The scale bar is 17  $\mu$ m. (B) Corresponding colocalization analysis of images from 'A'.

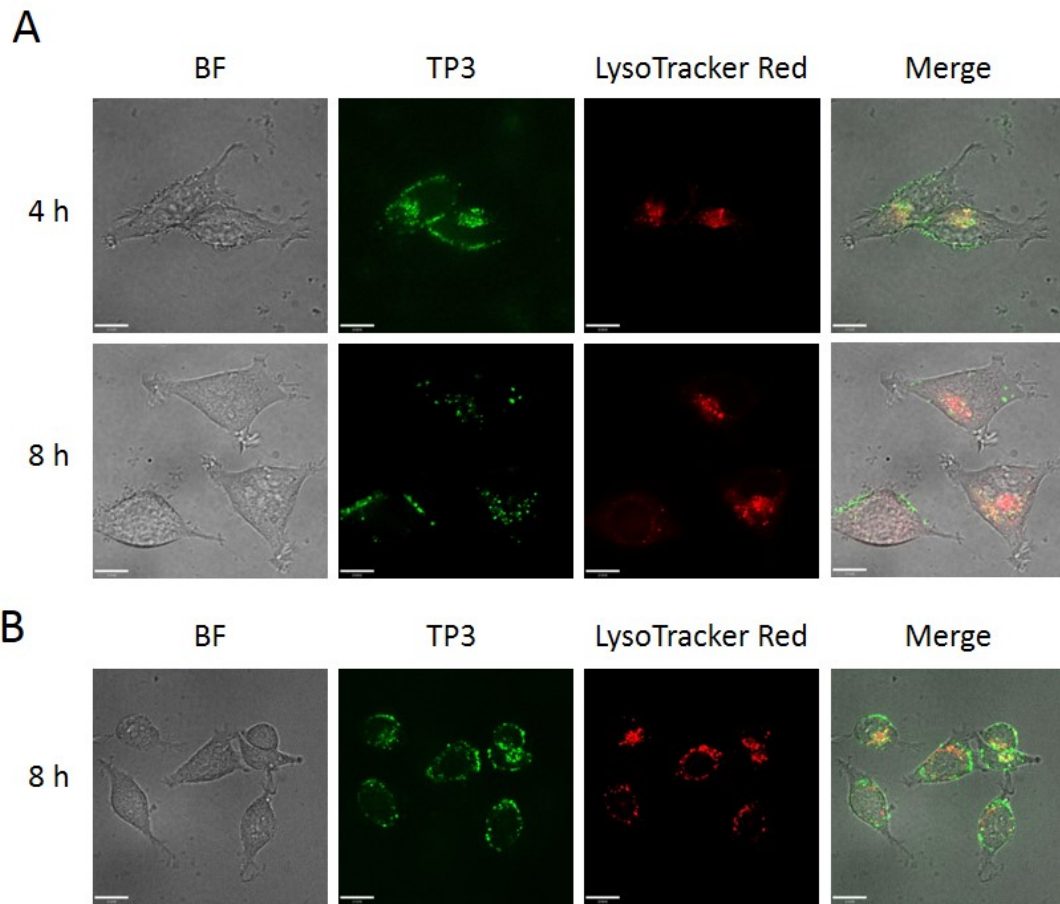

**Figure S24.** Time-dependent (4, 8 h) CLSM images for analyzing biodistribution of TP3 by MDA-MB-231 cells. (A) TP3 at 80  $\mu$ M, (B) TP3 at 120  $\mu$ M. Red (Lyso-Tracker Red) denotes lysosome, green denotes TP3. The scale bar is 17  $\mu$ m.



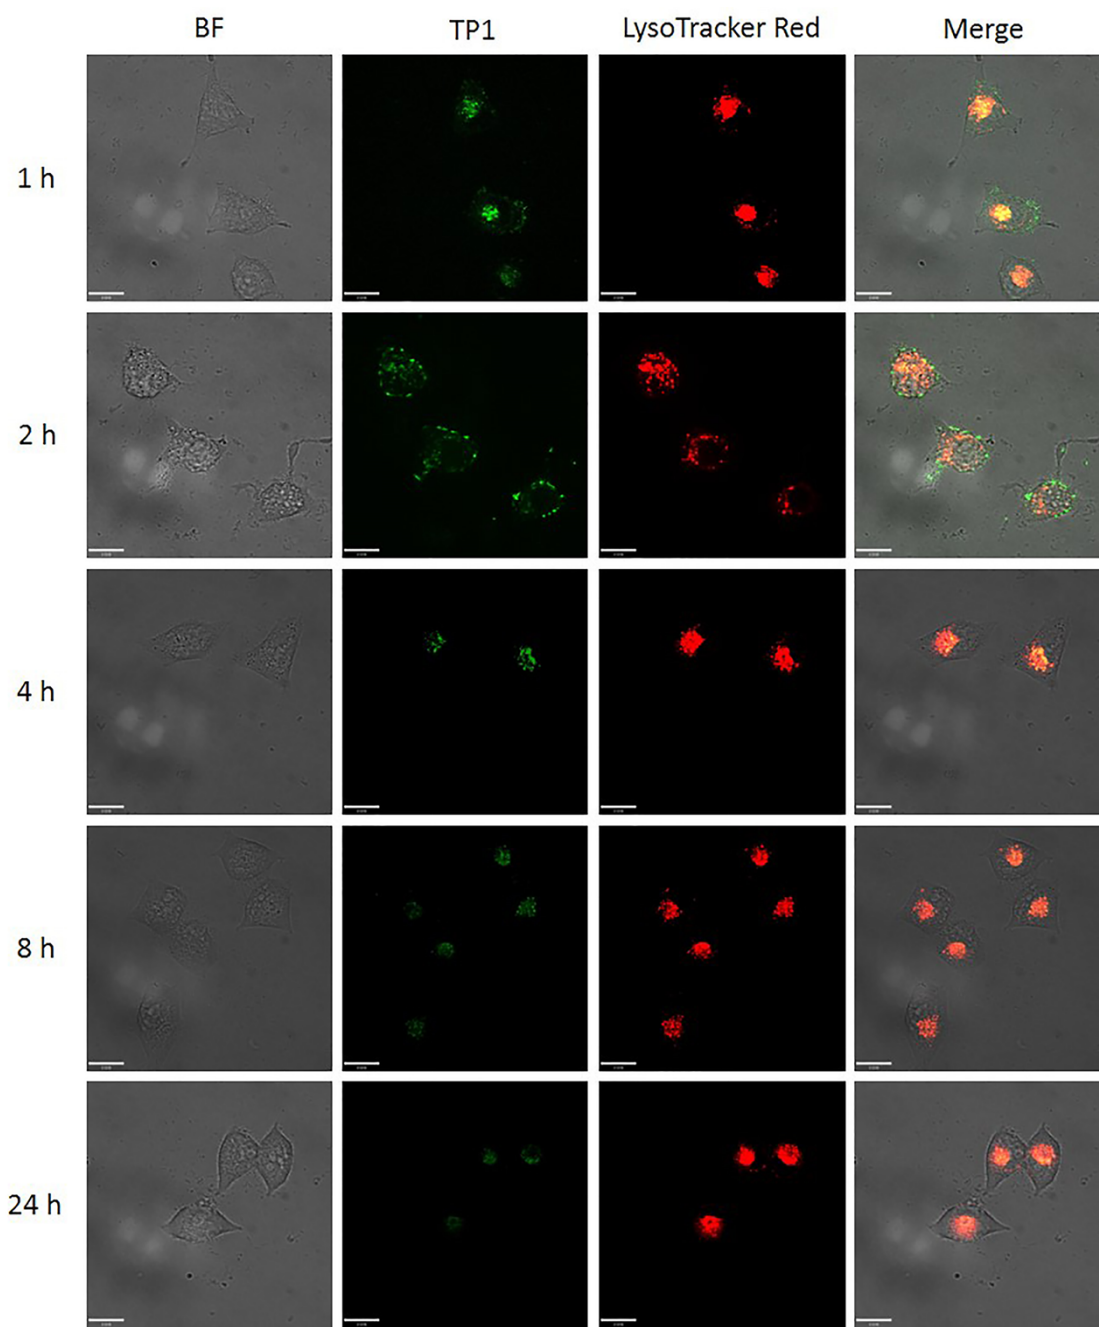

**Figure S25.** Time-dependent (1, 2, 4, 8, 24 h) CLSM images for analyzing biodistribution of TP1 at 40  $\mu\text{M}$  by MCF-7 cells. Red (Lyso-Tracker Red) denotes lysosome, green denotes TP1. The scale bar is 17  $\mu\text{m}$ .

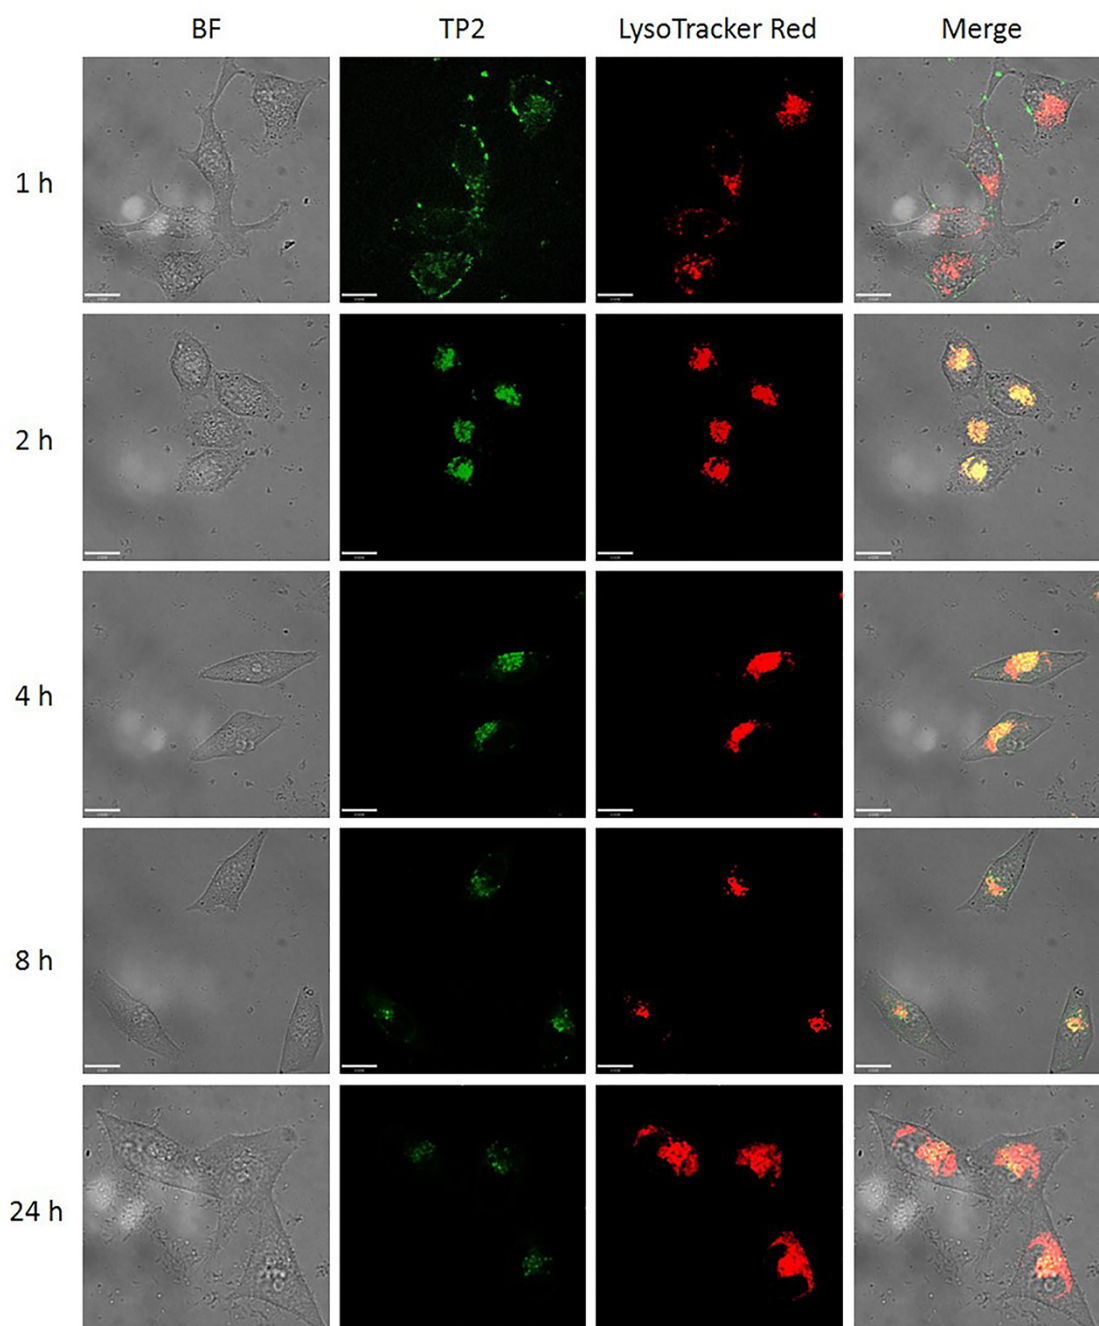

**Figure S26.** Time-dependent (1, 2, 4, 8, 24 h) CLSM images for analyzing biodistribution of TP2 at 40  $\mu\text{M}$  by MCF-7 cells. Red (Lyso-Tracker Red) denotes lysosome, green denotes TP2. The scale bar is 17  $\mu\text{m}$ .

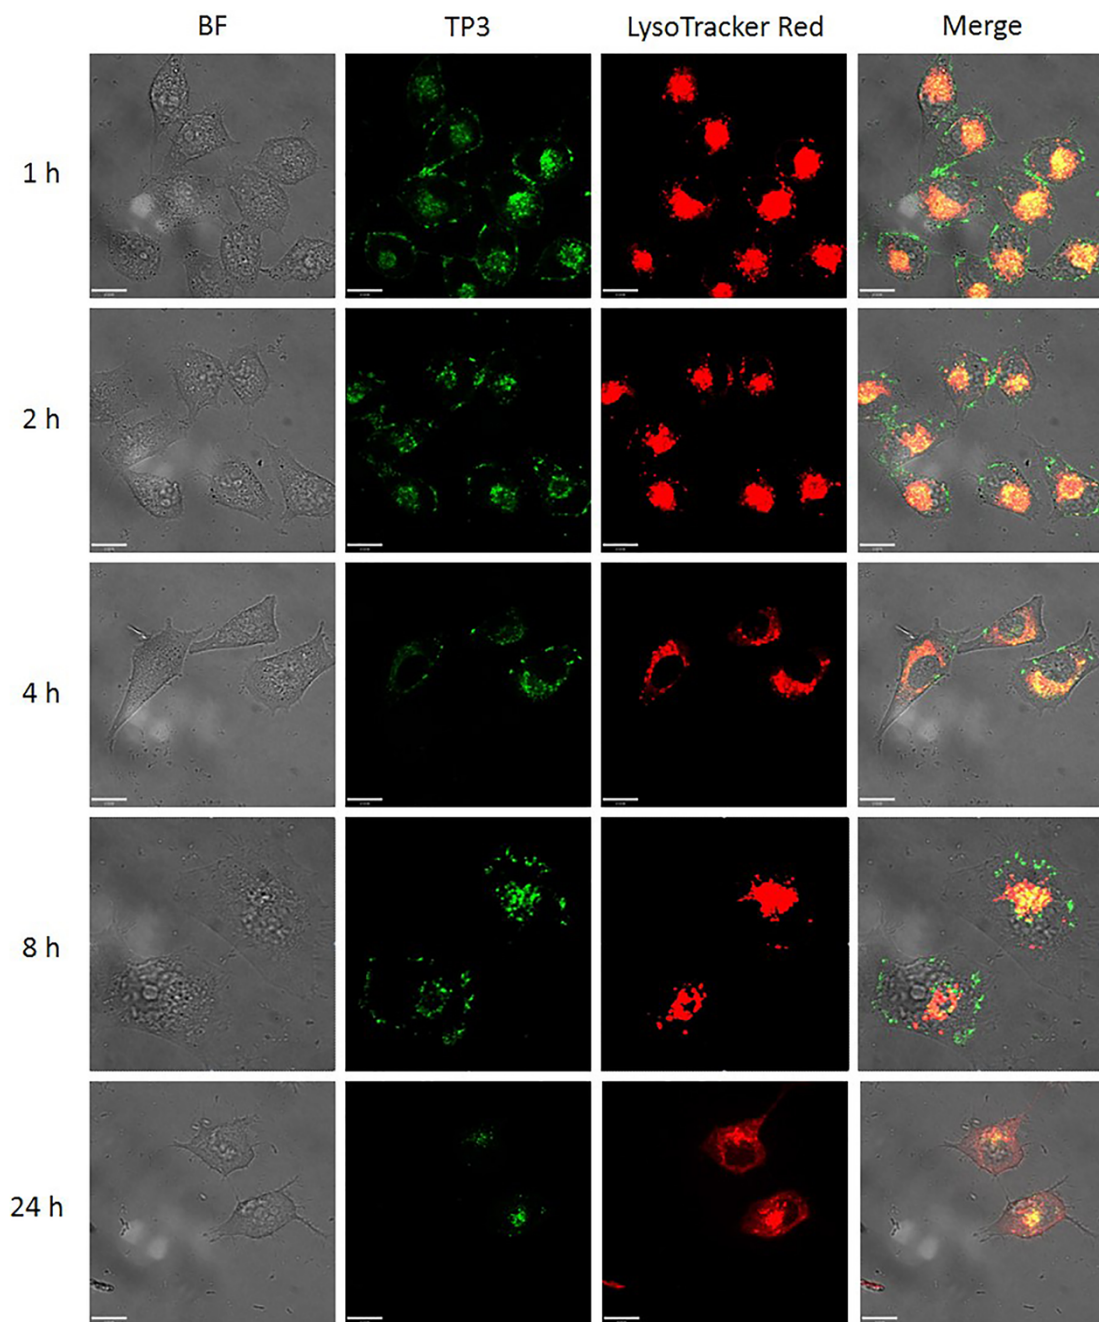

**Figure S27.** Time-dependent (1, 2, 4, 8h) CLSM images for analyzing biodistribution of TP3 at 40  $\mu\text{M}$  by MCF-7 cells. Red (Lyso-Tracker Red) denotes lysosome, green denotes TP3. The scale bar is 17  $\mu\text{m}$ .

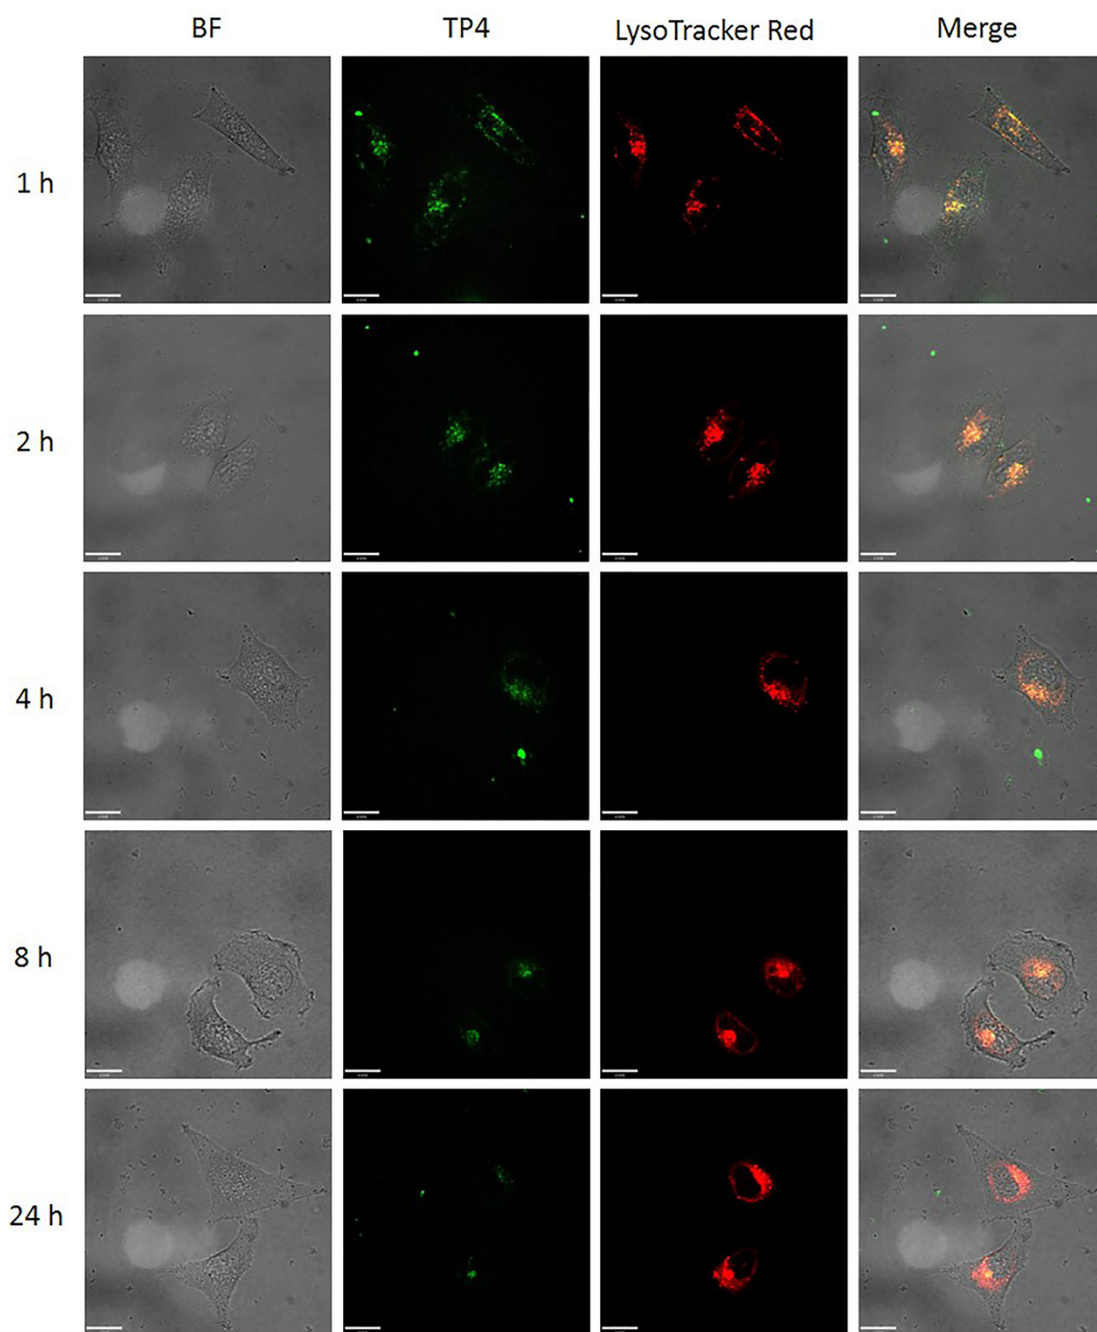

**Figure S28.** Time-dependent (1, 2, 4, 8, 24 h) CLSM images for analyzing biodistribution of TP4 at 40  $\mu\text{M}$  by MCF-7 cells. Red (Lyso-Tracker Red) denotes lysosome, green denotes TP4. The scale bar is 17  $\mu\text{m}$ .

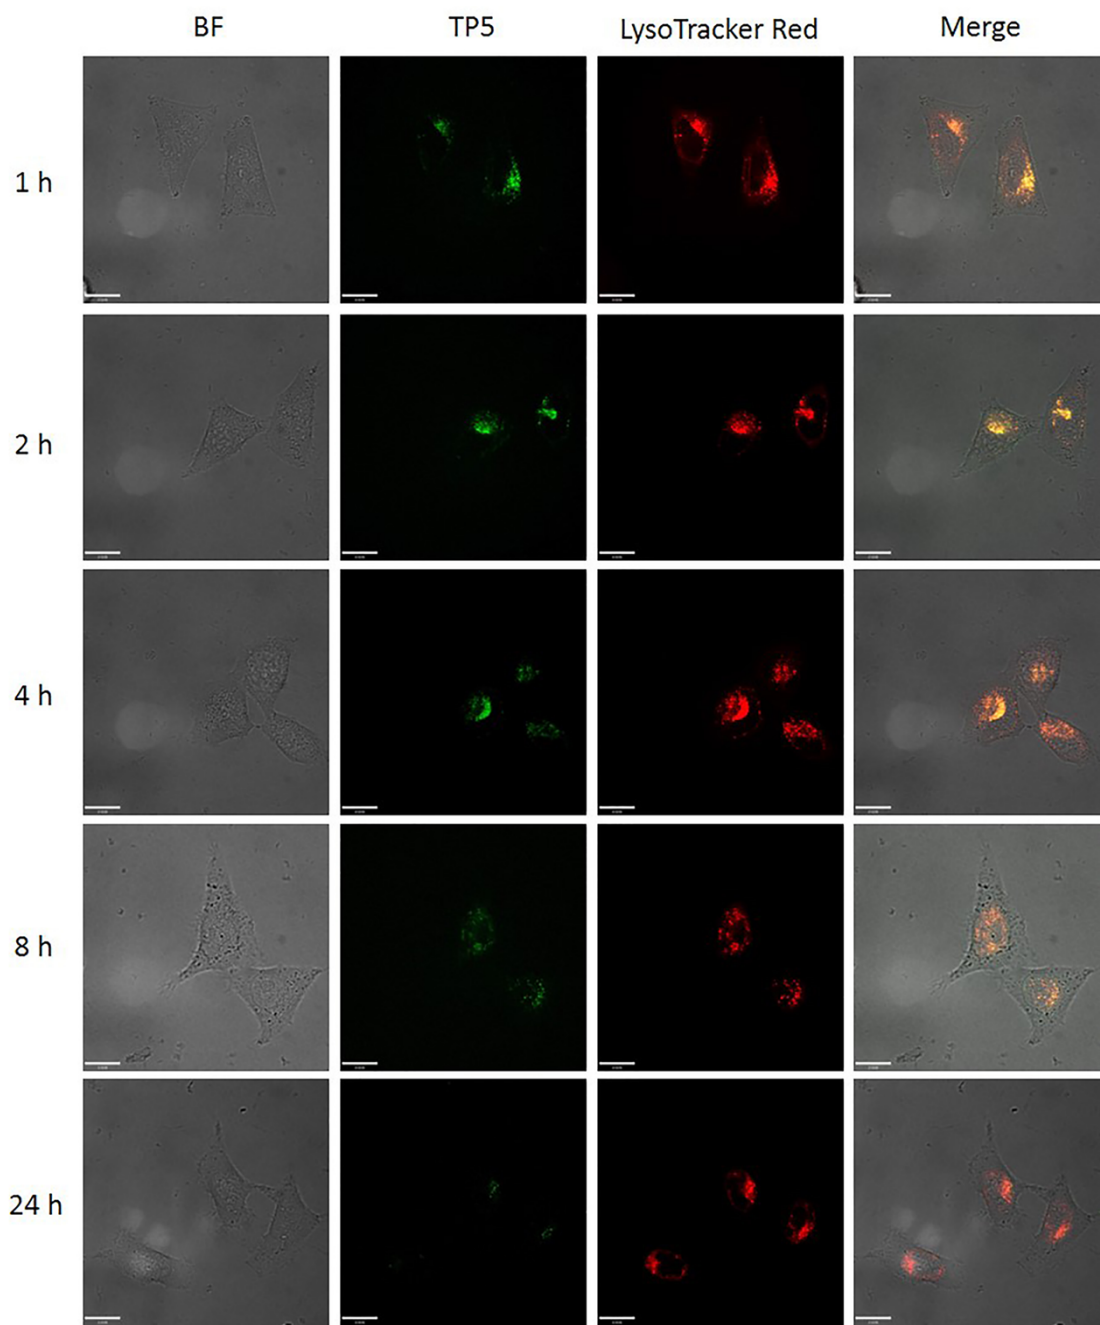

**Figure S29.** Time-dependent (1, 2, 4, 8, 24 h) CLSM images for analyzing biodistribution of TP5 at 40  $\mu\text{M}$  by MCF-7 cells. Red (Lyso-Tracker Red) denotes lysosome, green denotes TP5. The scale bar is 17  $\mu\text{m}$ .



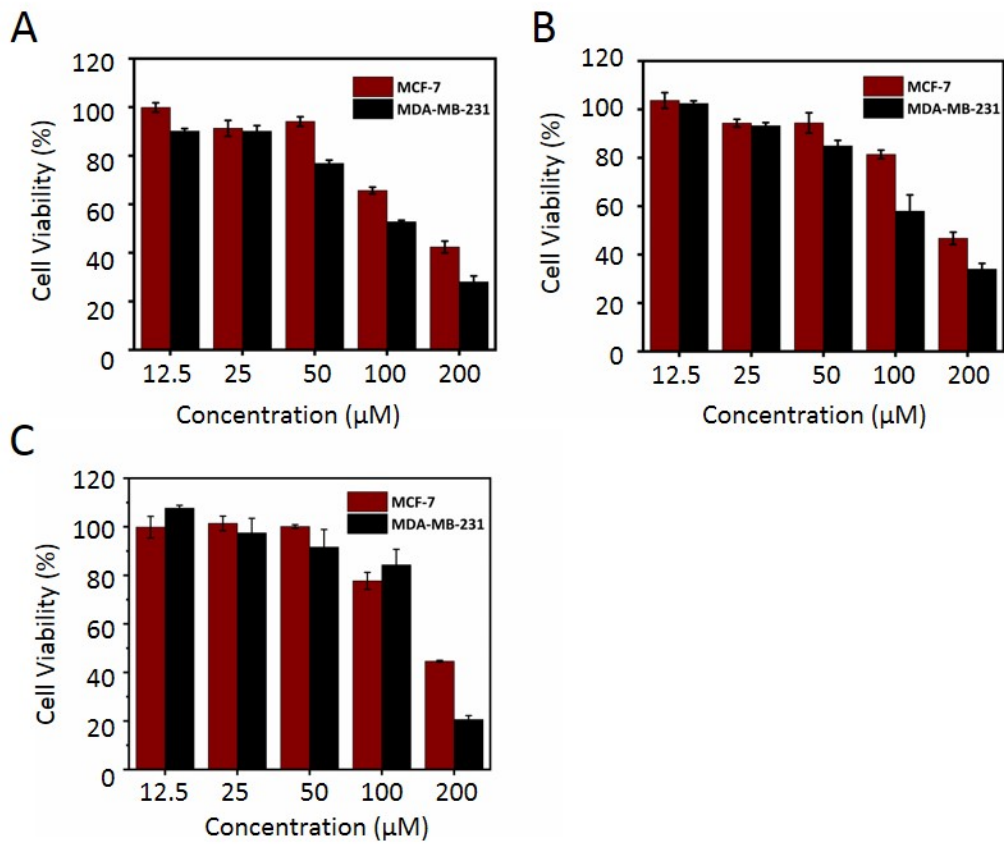

**Figure S30.** CCK-8 cell viability assay for (A) TP2, (B) TP4 and (C) TP5 after incubation with MDA-MB-231 cells and MCF-7 cells for 24 h.

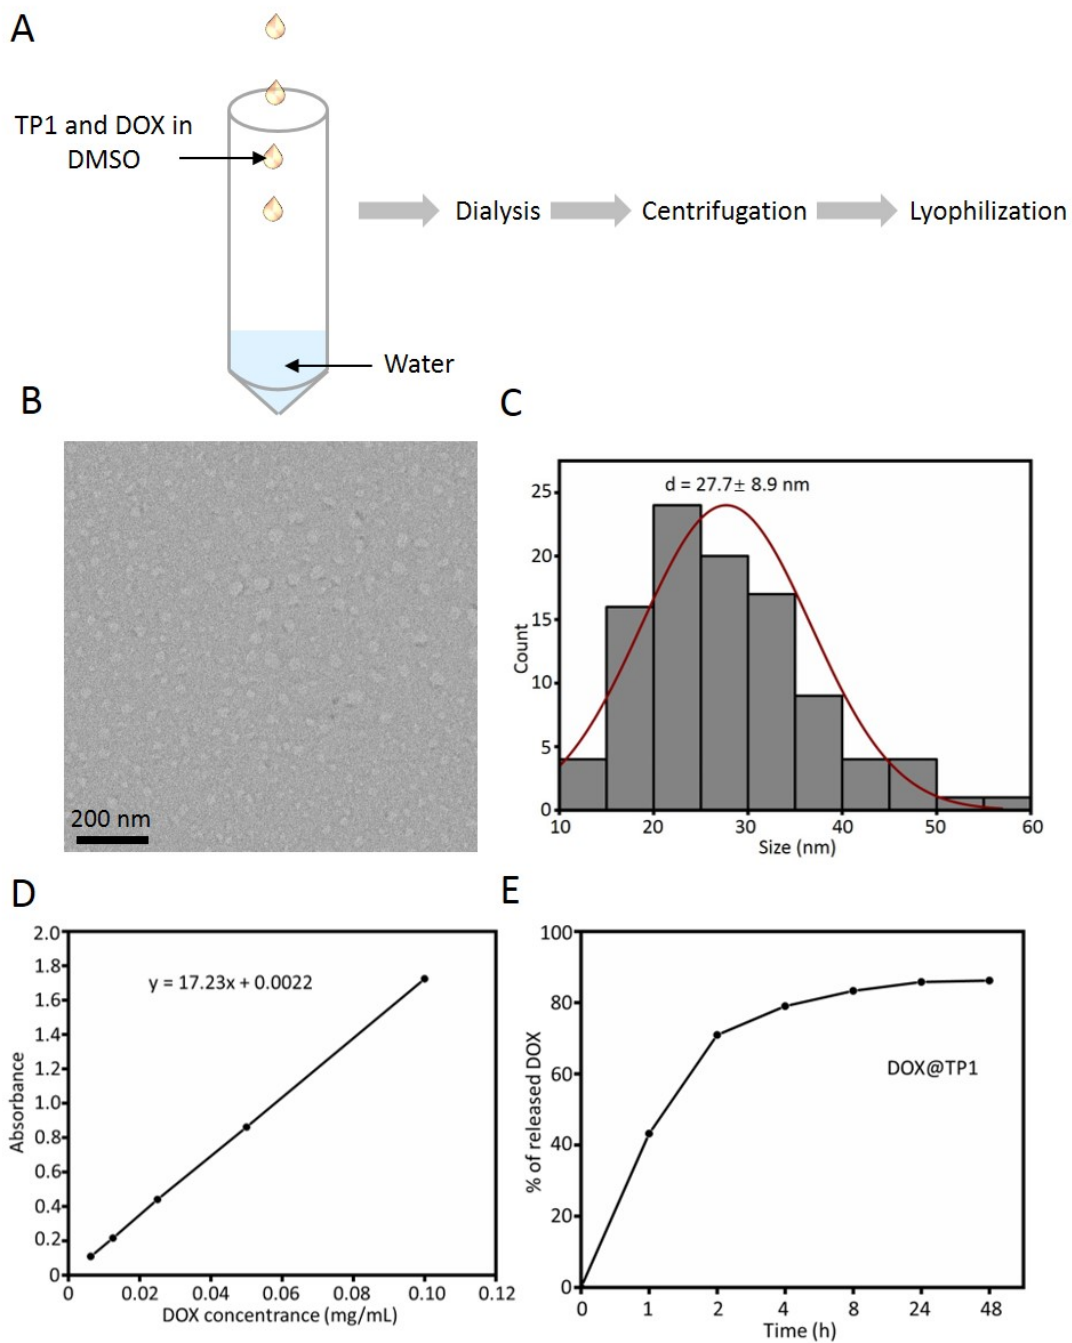

**Figure S31.** The preparation and characterized of DOX@TP3 NPs. (A) The schematic illustration of DOX@TP1 NPs. (B) TEM image of TP1@DOX NPs. (C) The size distribution of DOX@TP1 NPs from TEM images. (D) The standard curve of DOX concentration at 488 nm by UV spectrometer. (E) The release profile of DOX@TP1 in vitro.

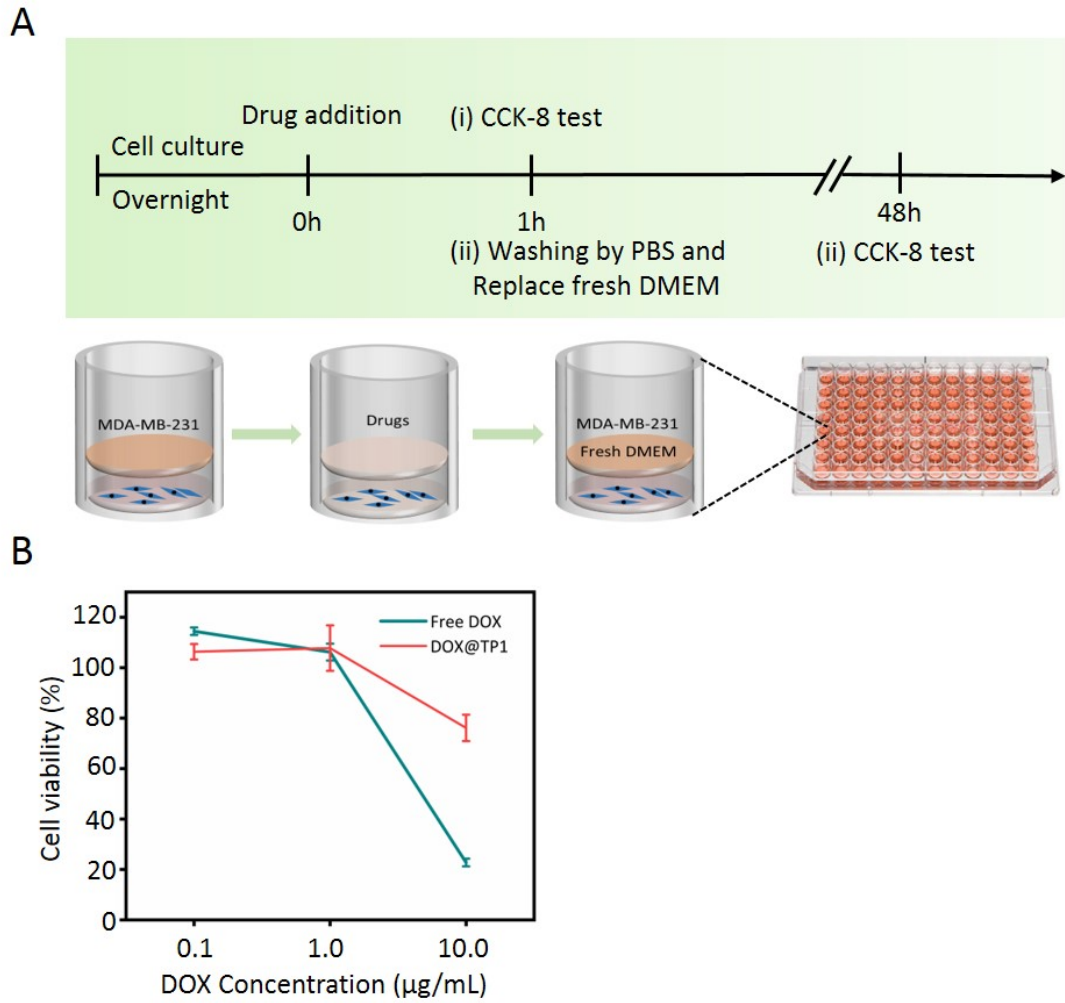

**Figure S32.** In vitro anti-tumor effect for Free DOX and DOX@TP1 after incubation with MDA-MB-231 cells. (A) The schematic illustration of CCK-8 test. (B) CCK-8 cell viability assay for free DOX and DOX@TP1 after incubation with MDA-MB-231 cells for 48 h.
